1 **Title:**

2 Structure and mechanism of oxalate transporter OxIT in an oxalate-degrading bacterium in the  
3 gut microbiota

4 **Authors:**

5 Titouan Jaunet-Lahary<sup>1</sup>, Tatsuro Shimamura<sup>2\*</sup>, Masahiro Hayashi<sup>3</sup>, Norimichi Nomura<sup>2</sup>,  
6 Kouta Hirasawa<sup>2</sup>, Tetsuya Shimizu<sup>4</sup>, Masao Yamashita<sup>4</sup>, Keiichi Kojima<sup>3</sup>, Yuki Sudo<sup>3</sup>,  
7 Takashi Tamura<sup>5</sup>, Hiroko Iwanari<sup>6</sup>, Takao Hamakubo<sup>6</sup>, So Iwata<sup>2</sup>, Kei-ichi Okazaki<sup>1\*</sup>,  
8 Teruhisa Hirai<sup>4\*</sup>, Atsuko Yamashita<sup>3,4\*</sup>

9 **Affiliation:**

10 <sup>1</sup>Research Center for Computational Science, Institute for Molecular Science, National  
11 Institutes of Natural Sciences, Okazaki, 444-8585, Japan, <sup>2</sup>Graduate School of Medicine,  
12 Kyoto University, Kyoto, 606-8501, Japan, <sup>3</sup>Graduate School of Medicine, Dentistry and  
13 Pharmaceutical Sciences, Okayama University, Okayama, 700-8530, Japan, <sup>4</sup>RIKEN  
14 SPring-8 Center, Sayo, 679-5148, Japan, <sup>5</sup>Graduate School of Environmental and Life  
15 Sciences, Okayama University, <sup>6</sup>Research Center for Advanced Science and Technology, The  
16 University of Tokyo, Tokyo 153-8904, Japan.

17 **Corresponding authors:**

18 Tatsuro Shimamura, Graduate School of Medicine, Kyoto University, Kyoto, 606-8501, Japan.

19 E-mail: [t.shimamura@mfour.med.kyoto-u.ac.jp](mailto:t.shimamura@mfour.med.kyoto-u.ac.jp)

20 Kei-ichi Okazaki, Research Center for Computational Science, Institute for Molecular  
21 Science, National Institutes of Natural Sciences, Okazaki, 444-8585, Japan. E-mail:  
22 [keokazaki@ims.ac.jp](mailto:keokazaki@ims.ac.jp)

23 Teruhisa Hirai, Current address: Japan Science and Technology Agency, Tokyo, 102-8666,  
24 Japan, E-mail: [teruhisa.hirai@jst.go.jp](mailto:teruhisa.hirai@jst.go.jp)

25 Atsuko Yamashita, Graduate School of Medicine, Dentistry and Pharmaceutical Sciences,

- 26 Okayama University, 1-1-1, Tsushima-naka, Kita-ku, Okayama 600-8530, Japan. Fax:
- 27 +81-86-251-7974. E-mail: [a\\_yama@okayama-u.ac.jp](mailto:a_yama@okayama-u.ac.jp).

28 **Abstract**

29 *Oxalobacter formigenes* is an oxalate-degrading bacterium in the gut microbiota that absorbs  
30 food-derived oxalate to use this as a carbon and energy source and thereby helps reduce the  
31 risk of kidney stone formation of the host animals <sup>1-4</sup>. The bacterial oxalate transporter OxIT  
32 uptakes oxalate from the gut to bacterial cells and excrete formate as a degradation product,  
33 with a strict discrimination from other carboxylates that serve as nutrients <sup>5-7</sup>. Nevertheless,  
34 the underlying mechanism remains unclear. Here, we present crystal structures of  
35 oxalate-bound and ligand-free OxIT in two different conformations, occluded and  
36 outward-facing states. The oxalate binding site contains two basic residues that form salt  
37 bridges with a dicarboxylate substrate while preventing the conformational switch to the  
38 occluded state without an acidic substrate, a ‘disallowed’ state for an antiporter <sup>8,9</sup>. The  
39 occluded ligand-binding pocket can accommodate oxalate but not larger dicarboxylates, such  
40 as metabolic intermediates. The permeation pathways from the binding pocket are completely  
41 blocked by extensive interdomain hydrophobic and ionic interactions. Nevertheless, a  
42 molecular dynamics simulation showed that a flip of a single side chain neighbouring the  
43 substrate is sufficient to trigger the gate opening. The OxIT structure indicates the underlying  
44 metabolic interactions enabling favourable symbiosis at a molecular level.

45

## 46 **Introduction**

47 Oxalate is the smallest dicarboxylate ( $C_2O_4^{2-}$ ) ingested through our daily diet from  
48 oxalate-containing foods <sup>10</sup>, such as vegetables, beans and nuts <sup>11</sup>. Oxalate is also a final  
49 metabolic product in our body and is partly secreted to the intestine via the systemic  
50 circulation <sup>10</sup>. Then it is absorbed from the intestinal tract and excreted through the kidney <sup>2</sup>.  
51 However, excess oxalate forms an insoluble salt with blood calcium and causes kidney stone  
52 disease (Fig. 1A). *Oxalobacter formigenes* is an oxalate-degrading bacteria in the gut <sup>12</sup> that  
53 can degrade intestinal oxalate and thus significantly contribute to oxalate homeostasis in the  
54 host. Indeed, patients with cystic fibrosis <sup>13</sup> or inflammatory bowel disease <sup>14</sup> or those who  
55 have undergone jejunioileal bypass surgery <sup>15</sup> are known to have low rates of colonisation of *O.*  
56 *formigenes* and an increased risk of hyperoxaluria and kidney stone formation.

57 Oxalate transporter (OxIT), an oxalate:formate antiporter (OFA) in *O. formigenes*,  
58 is a key molecule for oxalate metabolism in this bacterium. OxIT catalyses antiport of  
59 carboxylates across the cell membrane according to their electrochemical gradients with a  
60 substrate specificity optimised to the C2 dicarboxylate, oxalate. Indeed, the transporter shows  
61 a high turnover rate ( $>1000/s$ ) for oxalate self-exchange <sup>5,7</sup>. Under physiological conditions in  
62 the oxalate autotroph *O. formigenes*, the carboxylate-exchange function of OxIT enables  
63 uptake of oxalate from the host intestine as a sole carbon source for the bacterium and a  
64 release of formate ( $HCO_2^-$ ), the final degradation product of oxalate that is toxic if  
65 accumulated in the cell <sup>5-7</sup> (Fig. 1A). OxIT catalytic turnover of the oxalate:formate exchange  
66 is accompanied by the metabolic degradation of oxalate to formate via a decarboxylase that  
67 consumes a proton in the cytosol, consequently producing a proton electrochemical gradient  
68 across the bacterial cell membrane <sup>5</sup>. Therefore, OxIT serves as a ‘virtual proton pump’ that  
69 creates a proton motive force for bacterial ATP synthesis <sup>5</sup>. Thus, the functional characteristics  
70 of OxIT as an antiporter between oxalate and formate, rather than a uniporter of each

71 chemical, is essential to couple carbon metabolism and energy formation. Notably, OxIT does  
72 not accept oxaloacetate or succinate, which are Krebs cycle dicarboxylate intermediates, as  
73 substrates <sup>6</sup>. These dicarboxylates with four carbon atoms (C4 dicarboxylates) are important  
74 metabolic intermediates at the bacterial cytosolic side while they are also absorbed as energy  
75 sources and biosynthetic precursors through an intestinal transporter at the host lumen side <sup>16</sup>.  
76 Therefore, the ability of OxIT to discriminate between C2 and C4 dicarboxylates is critical for  
77 the favourable symbiosis between host animals and the gut bacterium.

78 OxIT belongs to the major facilitator superfamily (MFS), the large transporter  
79 family whose members transport a wide array of chemicals <sup>17</sup>. MFS proteins share a common  
80 architecture of twelve transmembrane (TM) helices that contain symmetrical N- and  
81 C-terminal halves of six gene-duplicated TM units, with a substrate-binding site in the centre  
82 of the molecule <sup>18,19</sup>. The substrate transport mechanism of the MFS family as well as other  
83 transporter families, is explained by the ‘alternating access model’ <sup>20,21</sup>, whereby transporter  
84 molecules open a cavity from the binding site to either side of the membrane alternately, and  
85 take outward-facing, occluded and inward-facing conformations via a ‘rocker switch’ motion  
86 of the N- and C-terminal domains, thereby allowing substrate transfer across the membrane <sup>22</sup>.  
87 Although a wealth of structural information of each MFS member has been accumulated <sup>23-25</sup>,  
88 current knowledge about the OFA family remains limited to an OxIT structure initially solved  
89 by electron crystallography at 6.5 Å <sup>8,26</sup>. Therefore, the specific oxalate recognition and  
90 antiport mechanism of OxIT is yet to be elucidated in a higher resolution structure. In this  
91 study, we report the X-ray crystallographic structures of OxIT in oxalate-bound and  
92 ligand-free forms solved at 3.0–3.3 Å to understand the structural basis of these key  
93 transporter functions that underly the symbiosis of this oxalate-degrading bacterium in the  
94 gut.

95

## 96 **OxIT structures in two different conformations**

97 The wild-type OxIT is unstable under various conditions, such as in the presence of chloride  
98 ion<sup>7,27</sup>, which significantly narrows the available chemical space for crystallisation screening.  
99 Therefore, OxIT was stabilised by binding antibody fragments, resulting in crystallisation  
100 under two different conditions. We confirmed that the Fab fragment used for crystallisation  
101 binds to OxIT both in the presence and absence of oxalate, suggesting that Fab-mediated  
102 artificial trapping of OxIT in a certain conformation is unlikely. The crystal structure of  
103 oxalate-bound OxIT in complex with the Fab fragment was solved at 3.0 Å while that of  
104 ligand-free OxIT in complex with an Fv fragment was solved at 3.3 Å (Extended Data Fig. 1A,  
105 1B, Extended Data Table 1).

106 The overall structure of OxIT consists of 12 TM helices (Fig. 1B, 1C), as observed  
107 in the previous EM structure<sup>26</sup> and later confirmed as a typical MFS architecture<sup>18,19</sup>. In the  
108 oxalate-bound state, the OxIT molecule adopts an occluded conformation with an oxalate  
109 molecule binding at the centre of the structure (Fig. 1, B and E). In contrast, the ligand-free  
110 OxIT takes a significantly different conformation from the oxalate-bound form (Fig. 1C, D, F).  
111 The OxIT molecule displayed a large V-shaped cavity between the N- (TM1–6) and the  
112 C-terminal (TM7–12) domains, which was connected from the central oxalate binding site to  
113 the periplasm, a clear signature of an outward-facing conformation.

114 In a comparison of the occluded and outward-facing structures, the C $\alpha$   
115 root-mean-square-deviation (RMSD) for all residues was 2.6–2.7 Å (Fig. 1D). Even the sole  
116 N- or C-terminal domains of the two showed significant structural differences (C $\alpha$  RMSD of  
117 1.5~1.6 Å). Therefore, the structural change between the occluded and outward-facing states  
118 with a ‘rocker switch’ motion is not achieved by the tilt of the rigid structural units but is  
119 concomitant with their bending. Indeed, conspicuous bends at the periplasmic portion were  
120 observed on TM1, 2, 4, 7, 8 and 11 in the outward-facing structure, with tilting of the other

121 surrounding TM helices (Fig. 1D). In contrast, there was no significant change of the  
122 cytoplasmic portion between the two conformations. In other MFS proteins, such as GLUT5  
123 and NarK, bending at the glycine residues in the TM helices has been observed between the  
124 different conformational states <sup>28,29</sup>. OxIT has 52 glycine residues, which is one eighth  
125 (12.4%) of the amino acid content (Fig. 1D, Extended Data Fig. 1C, Extended Data Fig. 2).  
126 Notably, this glycine frequency is significantly higher than that in other MFS proteins, such as  
127 LacY (8.6%), GLUT5 (7.6%) or NarK (10.4%), and in TM helices in other membrane  
128 proteins (~8.7%) <sup>30</sup>. Therefore, the accumulation of bending of the TM helices at the glycine  
129 residues is likely more prominent in achieving the conformational switch between the states  
130 in OxIT. Glycine residues were also found at the interface between the N- and C-terminal  
131 domains as in TM5 and TM8 or TM2 and TM11 (Extended Data Fig. 1C) and achieved tight  
132 helical packing as previously reported <sup>30,31</sup>. The high glycine occurrence observed in OxIT  
133 may be required to occlude the oxalate, which is small for a transported substrate, in the  
134 centre of the molecule.

135

### 136 **Oxalate-bound occluded structure**

137 In the crystal structure, the oxalate molecule binding to OxIT refined as a twisted  
138 configuration (Fig. 2A, Extended Data Fig. 3A). The bond between the two carboxyl groups  
139 in an oxalate dianion is known to be a single and unconjugated, allowing a free rotation of the  
140 carboxyl groups about the C-C bond <sup>32</sup>. Since the resolution of the oxalate-bound OxIT crystal  
141 is insufficient to accurately determine the dihedral angle of oxalate, we performed QM and  
142 QM/MM calculations of the oxalate binding in the occluded OxIT structure to examine the  
143 energetically minimised conformation. The resulting O-C-C-O dihedral angles in the oxalate  
144 were within 50–68° (Extended Data Fig. 3B, 3C, Extended Data Table 2). These values are  
145 close to those observed in the original crystal structure (60.1°), verifying that the oxalate is

146 not planar but twisted in the crystal structure.

147           At the binding site in OxIT, oxalate binds to the transporter with one carboxyl group  
148 forming a bidentate salt bridge with Arg272 in TM8 while the other forms an ionic interaction  
149 with Lys355 in TM11 (Fig. 2A). In addition to the salt-bridging with the oxalate, the  $\epsilon$ -amino  
150 group in Lys355 forms an interdomain hydrogen bond network with the carbamoyl groups in  
151 Gln34 (TM1) and Gln63 (TM2) in the N-terminal domain. Similarly, the guanidino group in  
152 Arg272 forms an interdomain hydrogen bond with the main chain carbonyl group in Ala147  
153 (TM5) and further interacts with the carbamoyl and main chain carbonyl group of Asn268  
154 upstream of TM8. The region around Arg272 is the bending point in TM8 due to the sequence  
155 of N<sup>268</sup>GGCR<sup>272</sup>P, and therefore the hydrogen bonds between Arg272 and Asn268 likely  
156 maintain the conformation and orientation of TM8 in the oxalate-bound structure. These inter-  
157 and intra-domain hydrogen bonding networks involving Arg272 and Lys355 likely play  
158 pivotal roles in organising the structure of the binding pocket and stabilising the occluded  
159 conformation, despite the location of these two basic residues within the C-terminal domain.  
160 These two basic residues are critical for oxalate transport, and even R272K or K355R  
161 mutations decrease the transport activity<sup>33-35</sup>. These results confirm observations that not only  
162 the charges but also the chemical structures of the side chains of the two residues are  
163 important for the structural organisation of the binding site.

164           In addition to the two basic residues, numerous aromatic residues are found to  
165 contribute to oxalate binding. The hydroxyl groups of Tyr35 and Tyr124 form hydrogen bonds  
166 with either of the carboxyl groups in oxalate (Fig. 2A). Furthermore, the aromatic side chain  
167 groups in Tyr150, Trp324, Tyr328 and Trp352 form face-to-face or edge-to-face  $\pi$ - $\pi$   
168 interactions with the carboxyl groups in oxalate, indicating the significance of the  $\pi$ -electron  
169 systems in oxalate for molecular recognition by OxIT. These aromatic residues distributed in  
170 both the N- and C-terminal halves, and thus their interactions with oxalate, are also significant



171 in stabilising the closure of the interdomain cavities to achieve the occluded conformation. In  
172 addition, Trp352 forms an interdomain hydrogen bond with Gln66 (TM2). Notably, a similar  
173 combination of ionic and  $\pi$ - $\pi$  interactions was also observed with the recognition of nitrate,  
174 which also presents a  $\pi$ -electron system, by NarK in the nitrate/nitrite porter (NNP) family  
175 <sup>28,31</sup>, although the NNP family is distant from the OFA family <sup>17</sup> and the positions of the  
176 involving residues do not correspond to each other (Fig. 2B).

177         The significance of the above-mentioned or their neighbouring residues for oxalate  
178 transport was verified by a functional assay using *E. coli* recombinant expressing wild-type  
179 and mutant OxIT. In the assay, the extent of oxalate-formate exchange by OxIT, which is  
180 negatively electrogenic, was assessed by coupling with light-driven inward proton transfer by  
181 a microbial rhodopsin, xenorhodopsin <sup>36</sup>, co-expressed in *E. coli* <sup>37</sup>. In addition to R272A and  
182 K355Q, which are the reported non-functional mutants <sup>33,34</sup> and had been verified their loss of  
183 activity in our previous study <sup>37</sup>, mutation of OxIT with Q34A, Y35A, N268A, W324A,  
184 Y328A and W352A also reduced activity, indicating the significance of these residues for  
185 transport function (Fig. 2C). These residues are conserved among the OFA family proteins  
186 (Extended Data Fig. 2).

187         The interactions between the substrate and the residues in the occluded OxIT crystal  
188 structure are optimised to the C2 dicarboxylate oxalate. Since the oxalate molecule tightly fits  
189 to the binding pocket, supplanting oxalate with a larger dicarboxylate, such as Krebs cycle  
190 intermediates, causes steric clashes with the residues in OxIT, likely destabilising the  
191 occluded conformation (Extended Data Fig. 4A). A flexible docking study resulted in a  
192 position that could accommodate a C3 dicarboxylate, malonate, in the binding site of the  
193 occluded OxIT, although this had fewer interactions compared with the case for oxalate, due  
194 to the rearrangement of amino acid residues in the binding pocket (Extended Data Fig. 4B).  
195 This is consistent with the reduced affinity and transport activity to malonate <sup>6</sup>. No pose for

196 the binding of C4 dicarboxylates to the occluded OxIT was observed even by flexible docking,  
197 consistent with a prior report indicating that there was no significant binding of these  
198 molecules to OxIT <sup>6</sup>.

199 From the oxalate binding site to the cytoplasm or periplasm, extensive  
200 intramolecular interactions were observed between TM helices in the N- and the C-terminal  
201 domains, such as TM2 and TM11, TM5 and TM8, the periplasmic halves of TM1 and TM7,  
202 and the cytoplasmic halves of TM4 and TM10 (Fig. 2, D–F). These interactions stabilise the  
203 closure of the interdomain cavities in the occluded structure.

204 In the cytoplasmic side below the oxalate binding site, hydrophobic interactions  
205 involving Met128 (TM4), Pro332 (TM10) and Tyr348 (TM11) were observed, followed by  
206 polar interactions between Asn129 (TM4) and Ser344 (TM11), Arg133 (TM4) and the main  
207 chain carbonyl groups of Thr341 and Ala342 (TM11) (Fig. 2D). These interactions are further  
208 supported with by charge-dipole interactions at the cytoplasmic end, formed between Asp78  
209 (TM2) or Asp280 (TM8) and the N-terminal ends of TM11 or TM5, respectively (Fig. 2E).  
210 The two aspartate residues located in the ‘A-like’ motifs in the TM2-3  
211 (‘G<sup>74</sup>YFVD<sup>78</sup>KFGP<sup>82</sup>R<sup>83</sup>IP’ sequence, A<sup>L2-3</sup>) or TM8-9 (‘G<sup>276</sup>FVSD<sup>280</sup>KIGR<sup>284</sup>YK’, sequence,  
212 A<sup>L8-9</sup>) regions (Extended Data Fig. 2). Motif A is one of the commonly conserved motifs in  
213 MFS proteins, and the D(+5) is known to participate in an interdomain charge-helix dipole  
214 interactions <sup>9</sup>. Notably, these aspartate residues further compose extensive ionic interaction  
215 networks in the cytoplasmic side (Fig. 2E). Specifically, Asp78 and Arg133 in TM4, and the  
216 downstream residue Asp137 and Arg16 in TM1, form salt bridges. Further downstream,  
217 Arg139 at the N-terminal end of TM5 forms a charge relay network with Asp337, Arg284 and  
218 Asp280.

219 In the periplasmic side above the oxalate binding site, a hydrogen bond between  
220 Thr38 (side chain) in TM1 and Val240 (backbone) in TM7 (2.72 Å) closes the pore tunnel in

221 the occluded conformation (Fig. 2F). Above the hydrogen bond, Leu39 (TM1), Leu52 (TM2),  
222 Val244 and Pro245 (TM7) and Val261 (TM8) form hydrophobic interactions.

223

### 224 **Ligand-free outward-facing structure**

225 In contrast to the occluded substrate-binding site in the oxalate-bound OxIT, a large cavity  
226 from the binding site to the periplasmic space is open in the ligand-free OxIT (Fig. 1F). At the  
227 empty binding site, the Lys355 side chain flips out from Arg272 due to charge repulsion and  
228 shifts the positions from those found in the oxalate-bound form (Fig. 3A). In the ligand-free  
229 form, most of the interdomain hydrogen bonds observed in the oxalate-bound state are  
230 retained. However, that between Lys355 in the C-terminal domain and Gln34 in the  
231 N-terminal domain is likely disrupted in the ligand-free state, judging by the distance between  
232 the side chains ( $>4$  Å). Positional shifts of the surrounding aromatic residues, such as Tyr35,  
233 Tyr150, Trp324 and Tyr328, were also observed (Fig. 3B). These changes at the  
234 substrate-binding site due to the absence of oxalate likely underlie the structural  
235 rearrangement of the overall architecture and result in the conformational change between the  
236 occluded and outward-facing state. Notably, the cavity opening to the periplasm displayed an  
237 extensive positively charged surface (Fig. 1F, 3C). This basic property is mainly derived from  
238 Arg272 and Lys355 in the binding site. In addition, the side-chain amino groups in Lys45 and  
239 Arg248 and the amide groups in Gln34, Asn42, Gln56, Asn264, Asn265 and Asn268, that line  
240 this cavity, are now exposed to the solvent. These groups and the positive dipole moments of  
241 the bent helices of TM1, TM5 and TM11 also contribute to the basic property of the entire  
242 cavity (Fig. 3C). The charge repulsion caused by Arg272 and Lys355 at the empty  
243 ligand-binding site as well as the extensive basic surface of the cavity likely prevents closure  
244 of the pocket to the occluded form in the absence of oxalate, thus stabilising an open state.  
245 The stability of an open state conformation in the absence of a substrate, which prevents

246 transition to the occluded state, underlies the OxIT function as an antiporter, in which the  
247 conformational switch in the absence of a substrate during the catalytic process is disallowed  
248 <sup>8,9</sup>. A similar situation was observed on a nitrate/nitrite antiporter NarK <sup>31</sup>, where the  
249 positively charged surface of the open cavity stabilised the inward-facing conformation <sup>28</sup>.

250 On the other hand, the cytoplasmic part of the ligand-free OxIT structure shows no  
251 significant changes from that of the oxalate-bound structure (Fig. 1D).

252

### 253 **Substrate-binding, hydrophobic gates and conformational dynamics of OxIT**

254 To address the structural dynamics of OxIT enabling the conformational switch necessary for  
255 the transport cycle, we performed molecular dynamics (MD) simulations <sup>38</sup> based on the  
256 oxalate-bound occluded and the ligand-free outward-facing OxIT crystal structures.

257 We first simulated oxalate binding to the ligand-free outward-facing conformation  
258 (Fig. 4, A–C). Spontaneous binding of oxalate ion to the binding site of OxIT was observed at  
259 Gln34, Tyr35, Arg272, Tyr328 and Lys355 (Fig. 4B). An extensive positively charged surface  
260 (Fig. 1F, 3C) contributes to a rapid spontaneous binding of the negatively charged oxalate ion.  
261 The stability of the bound conformation was dependent on the protonation state of Lys355  
262 (see Methods for  $pK_a$  calculation), which could be affected by the luminal pH in the gut,  
263 varying  $\sim 5 - 8$  by regions <sup>39</sup>. For the protonated Lys355, a single binding event was observed,  
264 and the bound oxalate ion remained in the binding site for the rest of the simulation, whereas  
265 several binding and unbinding events were observed for the neutral Lys355 (Fig. 4C). During  
266 the 1.7  $\mu$ s simulations, the outward-facing conformation of OxIT was stable, as shown in the  
267 plot of the RMSD of the backbone atoms from the outward-facing crystal structure (Fig. 4A).  
268 The results suggest that the spontaneous binding of the oxalate observed in the simulations is  
269 an early-stage binding mode that should be followed by the conformational rearrangement  
270 and desolvation of the binding site and the transition to the occluded conformation to adapt

271 the fully bound conformation.

272 We next addressed the conformational dynamics of the occluded conformation in  
273 the oxalate-bound state. During the 1  $\mu$ s simulation, two out of three independent trajectories  
274 remained in the occluded state (Fig. 4D). In the occluded conformation, most water molecules  
275 were blocked at certain positions in the periplasmic and cytoplasmic sides of the transporter  
276 during the simulations, although some entered OxIT (Fig. 4E). A water density analysis  
277 pinpointed structural layers blocking entry of water into the oxalate binding site during the  
278 simulation (Extended Data Fig. 5). One of these is a hydrophobic layer constituting of Thr38  
279 and Leu39 in TM1, Val244 in TM7 and Val261 in TM8 at the periplasmic side (lower left  
280 panel of Fig. 4E). This layer, combined with the hydrogen bond between Thr38 and Val240 in  
281 TM7 (shown by a broken line in lower left panel of Fig. 4E), also blocked the exit of ligand to  
282 the extracellular side and thus served as the periplasmic gate. The other layer consists of  
283 Met128 in TM4, Pro332 in TM10 and Tyr348 in TM11 at the cytoplasmic side (lower right  
284 panel of Fig. 4E). These periplasmic and cytoplasmic hydrophobic gates, together with the  
285 TM1–TM7 hydrogen bond, have similarity with the previously reported NarK transporter <sup>40</sup>,  
286 based on residues located at similar positions to those in OxIT in the aligned structure  
287 (Extended Data Fig. 6). This result suggests that the hydrophobic gates <sup>38</sup> are a conserved  
288 mechanism among the two transporters.

289 In contrast, in one trajectory from the occluded conformation, an opening of the  
290 periplasmic gate was observed (blue line in Fig. 4D). In the transition, the flip of Gln34 side  
291 chain from the binding site occurred first (Fig. 4F, Extended Data Fig. 7A). The Gln34 flip  
292 resulted in a disruption of the hydrogen bond with Lys355, as observed in the outward-facing  
293 crystal structure (Fig. 3A). Furthermore, since Gln34 is located one-turn upstream of Thr38 in  
294 TM1, the flip also caused a constant disruption of the hydrogen bond between Thr38 and  
295 Val240, which was bonded on and off by thermal fluctuation even before the flip (shown by a

296 broken line in Fig. 4F; Extended Data Fig. 7B). After ~280 ns following the Gln34 flip, OxIT  
297 started opening to the outside and many water molecules entered the transporter (Fig. 4F). We  
298 note that the Gln34 flip is a transient conformation and that the side chain returned to the  
299 original position after reaching the outward-facing state in the last part of the simulation,  
300 consistent with the observation on the outward-facing crystal structure (Extended Data Fig.  
301 7A and 7C). Notably, the Gln34 flip was also observed in a trajectory starting from the  
302 occluded conformation with formate modelled in the binding site (Extended Data Fig. 8). In  
303 this trajectory, the hydrogen bond between Thr38 and Val240 was again completely broken  
304 after the Gln34 flip, followed by a transition from the occluded to the outward-facing  
305 conformation, in accordance with the physiological reaction of the formate release to  
306 periplasm in *O. formigenes*. In contrast, the Gln34 flip was not observed in any of the other  
307 trajectories unaccompanied with the conformational transition in both the oxalate- and  
308 formate-bound forms (Extended Data Fig. 7, 8). These results suggest that the Gln34 side  
309 chain, together with the hydrogen bond between Thr38 and Val240, works as a switch of the  
310 transition from the occluded to the outward-facing conformations. Indeed, Gln34 was  
311 identified as critical in the transport assay (Fig. 2C) and, together with Thr38, is strictly  
312 conserved among the OFA family (Extended Data Fig. 2).

313           The O-C-C-O dihedral angle of the oxalate ion in the occluded binding site became  
314 ~90° after the Gln34 flip (Extended Data Fig. 9A), which is the value observed in solution<sup>41</sup>.  
315 This contrasts with the other two trajectories without the Gln34 flip, where the oxalate  
316 dihedral angle remained around 40–50° (and its inverted position at 130–140°; Extended Data  
317 Fig. 9A), which is similar to those found in the crystal structure and the QM/MM calculations.  
318 Intriguingly, the values observed in the bound oxalate to the outward-facing OxIT during the  
319 simulation were broadly distributed with double peaks at ~60° and ~120° (Extended Data Fig.  
320 9B), which differ from those in solution and rather closer to those in the occluded crystal

321 structure. These results imply that the bound oxalate rearranges its conformation according to  
322 the environmental change derived by OxIT conformational changes and takes a favourable  
323 conformation to the next step in the transporter cycle.

324 No opening of the cytoplasmic gate was observed during the 1  $\mu$ s simulation for  
325 any of the trajectories from the occluded conformation. This may be attributed to the  
326 extensive interdomain interactions observed at the cytoplasmic side, such as the motif A  
327 involving charge relay networks (Fig. 2E) known to stabilise the outward-facing conformation  
328 <sup>9</sup>. These results suggested that the transition from the occluded to the inward-open state has a  
329 slow kinetics among the entire transport process.

330

### 331 **Discussion**

332 The two crystal structures of OxIT and the MD simulations based on them provided clues to  
333 understand the alternating access transport process of OxIT (Fig. 5). The following process is  
334 described according to the electrochemical gradient formed in *O. formigenes* within the gut.  
335 For the oxalate uptake process, OxIT exhibits an extensive positively charged surface in the  
336 cavity open to the periplasm, allowing a spontaneous binding of acidic oxalate to the binding  
337 site. The positively charged surface also avoids the conformational transition to the next  
338 transport step in the absence of the substrate that is an indispensable characteristic for an  
339 antiporter. Nevertheless, the oxalate binding neutralises the local positive charge and enables  
340 the conformational switch from the outward-facing conformation to the occluded  
341 conformation. The occluded state is an essential step for transport to serve as a discriminatory  
342 checkpoint between oxalate and necessary host metabolic intermediates, such as those in the  
343 Krebs cycle, using the size restriction imposed by the binding pocket. The occluded  
344 conformation may eventually allow opening of the cytoplasmic gate and release of oxalate to  
345 the cytoplasm.

346           Subsequently, a formate binding to the inward-facing OxIT may return the  
347 transporter to the occluded state. The conformational transition required for returning from  
348 the occluded to the initial outward-facing states in the antiport cycle can be achieved by a  
349 transient flip of a side chain of a substrate-neighbouring residue, Gln34, and disruption of the  
350 hydrogen bond between Thr38 and Val240. The conformational landscape plotted by the  
351 periplasmic gate (Thr38–Val240) and cytoplasmic gate (Met128–Pro332) distances <sup>40,42</sup>  
352 sampled in the MD simulations shows that the order parameters separate the occluded and  
353 outward-facing conformations well (red and yellow plots, Fig. 5 inset). Nevertheless, the only  
354 trajectory that accompanies the Gln34 flip shows a full transition covering the endpoint  
355 occluded and outward-facing crystal structures (blue points in Fig. 5 inset).

356           These structural observations imply that OxIT utilises the MFS architecture and  
357 evolved in accordance with favourable symbiosis between the host animals and gut microbes.  
358 The structural and functional characteristics of OxIT also likely underlie those of the other  
359 OFA family members. Approximately 2000 OFA members are registered in the database <sup>43</sup>,  
360 and all but OxIT are functionally uncharacterised. Therefore, knowledge concerning OxIT  
361 also contributes to understanding unknown ‘dark’ protein families. Clarifying the  
362 inward-facing conformations of OxIT (a dotted circle in Fig. 5 inset) is the next challenge  
363 understanding the structural biology of OxIT.

364

## 365 **Methods**

### 366 **Preparation of OxIT**

367 C-terminal nona-His-tagged OxIT was expressed in *E. coli* XL3 at 20 °C for 24 h with 1 mM  
368 isopropyl- $\beta$ -D-thiogalactopyranoside (IPTG) <sup>44</sup>. Bacterial cells were suspended in lysis buffer  
369 (50 mM Tris-HCl, 200 mM K acetate, 1 mM EDTA, 1 mM PMSF, 5 mM MgCl<sub>2</sub>, 20  $\mu$ g/mL  
370 DNaseI and 0.23 mg/mL lysozyme) and then disrupted using EmulsiFlex C-5 (Avestin). Cell



371 debris was removed by centrifugation ( $9,600 \times g$  for 30 min), and cell membranes were then  
372 collected by centrifugation ( $185,000 \times g$  for 1 h). The membrane fraction was solubilised with  
373 40 mM dodecylmaltoside (DDM) in buffer A (20 mM HEPES-KOH, 200 mM potassium  
374 acetate, 10 mM potassium oxalate and 20% glycerol, pH 8.0) and applied to Ni-NTA  
375 Superflow resin (QIAGEN) or HisTrap FF crude (GE Healthcare) in an XK16 column (GE  
376 Healthcare). The column was washed with buffer A (1 mM DDM and 30–50 mM imidazole),  
377 and then protein was eluted with buffer A containing 1 mM DDM and 250 mM imidazole.

378

### 379 **Preparation of antibody fragments**

380 All animal experiments conformed to the guidelines of the Guide for the Care and Use of  
381 Laboratory Animals of Japan and were approved by the Animal Experimentation Committee  
382 at the University of Tokyo. A proteoliposome antigen was prepared by reconstituting purified  
383 functional OxIT at high density into phospholipid vesicles consisting of a 10:1 mixture of egg  
384 phosphatidylcholine (PC) (Avanti Polar Lipids) and adjuvant lipid A (Sigma) to facilitate an  
385 immune response. BALB/c mice were immunised with the proteoliposome antigen using  
386 three injections at two-week intervals.

387 **(i) D5901Fab:** Mouse monoclonal antibodies against OxIT were selected as previously  
388 described<sup>45</sup>. Antibody-producing hybridoma cell lines were generated using a conventional  
389 fusion protocol. Hybridoma clones producing antibodies that recognised conformational  
390 epitopes in OxIT were selected by a liposome enzyme-linked immunosorbent assay (ELISA)  
391 on immobilised phospholipid vesicles containing purified OxIT, allowing positive selection of  
392 the antibodies that recognised the native conformation of OxIT. Additional screening for  
393 reduced antibody binding to SDS-denatured OxIT was used for negative selection against  
394 linear epitope-recognising antibodies. Stable complex formation between OxIT and each  
395 antibody clone was checked with fluorescence-detection size-exclusion chromatography.

396 Whole IgG molecules, collected from the large-scale culture supernatant of monoclonal  
397 hybridomas and purified using protein G affinity chromatography were digested with papain,  
398 and Fab fragments were isolated using HiLoad 16/600 Superdex200 gel filtration followed by  
399 protein A affinity chromatography. The sequence of the Fab was determined via standard  
400 5'-RACE using total RNA isolated from hybridoma cells.

401 **(ii) 20D033Fv:** Single-chain Fv (scFv) fragments against OxIT were screened out from an  
402 immunised mouse phage displayed antibody library<sup>46</sup>. Immunised mice were euthanised, and  
403 their splenocyte RNA isolated and converted into cDNA via reverse-transcription PCR. The  
404 V<sub>L</sub> and V<sub>H</sub> repertoire was assembled via an 18-amino acid flexible linker and cloned into the  
405 phage-display vector pComb3XSS. Biotinylated proteoliposomes were prepared by  
406 reconstituting OxIT with a mixture of egg PC and  
407 1,2-dipalmitoyl-sn-glycero-3-phosphoethanolamine-N-(cap biotinyl) (16:0 biotinyl Cap-PE;  
408 Avanti), and used as binding targets for scFv-phage selection. Targets were immobilised onto  
409 streptavidin-coated paramagnetic beads (Dynabeads) or streptavidin-coated microplates  
410 (Nunc). After four rounds of biopanning, liposome ELISAs were performed on periplasmic  
411 extracts of individual colonies. Positive clones were collected and evaluated using a Biacore  
412 T100 (GE Healthcare).

413 Antibody scFv fragments are undesirable for use as crystallisation chaperones because  
414 they can intermolecularly form domain-swapped dimers, and the dimer-monomer equilibrium  
415 may increase structural heterogeneity. Therefore, we used Fv fragments for crystallisation  
416 trials. The Fv fragment were expressed in *Brevibacillus choshinensis* using the iRAT system<sup>47</sup>.  
417 Culture supernatant was adjusted to 60% ammonium sulphate saturation, and the precipitate  
418 was pelleted, dissolved in TBS buffer (10 mM Tris-HCl, pH 7.5, 150 mM NaCl) and  
419 dialysed overnight against the same buffer. Dialysed proteins were mixed with Ni-NTA resin  
420 equilibrated with buffer B (10 mM Tris-HCl, pH 7.5, 150 mM NaCl and 20 mM imidazole).

421 Bound proteins were eluted with buffer C (10 mM Tris-HCl, pH 7.5, 150 mM NaCl and 250  
422 mM imidazole), mixed with TEV-His<sub>6</sub> and dialysed overnight against TBS buffer. Cleaved  
423 His<sub>6</sub> tag and TEV-His<sub>6</sub> were removed using a HisTrap column equilibrated with buffer B. The  
424 tag-free Fv fragment was concentrated and loaded onto a HiLoad16/60 Superdex75 column  
425 (GE Healthcare) equilibrated with TBS buffer. Peak fractions were pooled, concentrated, flash  
426 frozen in liquid nitrogen and stored at -80 °C.

427

## 428 **Crystallisation**

429 For crystallisation of oxalate-bound OxIT complexed with D5901-1A08-Fab, the purified  
430 OxIT was mixed with purified D5901-A08-Fab at a 1:1.3 molar ratio at 4 °C overnight and  
431 applied to a HiLoad 16/60 Superdex200 pg column (GE healthcare) using buffer D (20 mM  
432 MES-KOH, 200 mM potassium acetate, 10 mM potassium oxalate, 20% glycerol, and 0.51  
433 mM DDM, pH 6.2) as running buffer. Purified sample was dialysed in buffer E (20 mM  
434 MES-KOH, 10 mM potassium oxalate and 0.51 mM DDM, pH 6.2). Crystals were obtained  
435 by the sitting-drop vapour diffusion method at 20 °C by mixing purified sample (~10 mg/mL)  
436 with a reservoir solution of 0.1 M sodium citrate, pH 5.5, 0.05 M NaCl and 26% (v/v)  
437 PEG400. Crystals were frozen in liquid nitrogen in advance of data collection.

438 For crystallisation of ligand-free OxIT complexed with 20D033-Fv, purified OxIT  
439 was mixed with purified 20D033-Fv at a 1:2 molar ratio at 4 °C overnight and purified using  
440 Superdex200 Increase 10/300 GL (GE healthcare) in 20 mM MES-KOH, 10 mM potassium  
441 oxalate and 0.02% DDM, pH 6.2. Purified sample was reconstituted into a lipidic mesophase.  
442 The protein-LCP mixture contained 50% (w/w) protein solution, 45% (w/w) monoolein  
443 (Sigma) and 5% (w/w) cholesterol (Sigma). The resulting lipidic mesophase was dispensed as  
444 50 µL drops into 96-well glass plates and overlaid with 0.8 µL of precipitant solution using an  
445 NT8-LCP crystallisation robot (Formulatrix) and were then covered with thin cover glasses.

446 Crystallisation setups and the 96-well glass sandwich plates (Molecular Dimension) were  
447 incubated at 20 °C. Crystals were obtained in a week under the following precipitation  
448 conditions: 100 mM Glycine, pH 9.0, 26–36% (v/v) PEG400, and 50–150 mM MnCl<sub>2</sub>.  
449 Crystals were harvested directly from the lipidic mesophase using Mesh Litholoops (Protein  
450 Wave) and flash cooled in liquid nitrogen.

#### 451 **Data collection and structure determination**

452 X-ray diffraction data for oxalate-bound OxIT and for ligand-free OxIT were collected at 1.0  
453 Å at the SPring-8 beamline BL41XU using MX225HE (Raynox) and BL32XU using an  
454 EIGER X 9M detector (Dectris, Ltd), respectively, under a cryostream operating at 100 K.  
455 Data were merged, integrated and scaled to 2.6 Å (oxalate-bound OxIT) and 3.1 Å  
456 (ligand-free OxIT) using the KAMO system <sup>48</sup>, which exploits BLEND <sup>49</sup>, XDS <sup>50</sup> and  
457 XSCALE <sup>51</sup> (Extended Data Table 1). Data were corrected for anisotropy using the  
458 STARANISO server <sup>52</sup>. The correction deleted many weak reflections with very low spherical  
459 completeness in the higher resolution shells. For refinement, we used data to 3.0 Å  
460 (oxalate-bound OxIT) and 3.3 Å (ligand-free OxIT) that contained more than 25%  
461 (oxalate-bound OxIT) and 22% (ligand-free OxIT), respectively, of the data in the highest  
462 shell. The crystal structure was solved using molecular replacement with PHASER <sup>53</sup>. The  
463 search models were structures of N- and C-terminal halves of the glycerol-3-phosphate  
464 transporter GlpT (PDB ID: 1PW4) <sup>19</sup> and an Fab fragment (PDB ID: 1XF4) <sup>54</sup> for  
465 oxalate-bound OxIT, and structures of N- and C-terminal halves of oxalate-bound OxIT  
466 determined in this study (residues 11–199 and 204–404, respectively) and a scFv fragment  
467 (PDB ID: 5B3N) <sup>55</sup> for ligand-free OxIT. Structure models were manually rebuilt with COOT  
468 <sup>56</sup> and refined with Phenix <sup>57</sup>. In the ligand-free OxIT crystal, two units of OxIT (chain A and  
469 D) were found in an asymmetric unit. No significant structural difference was observed  
470 between the two (C $\alpha$  RMSD of 0.365 Å for residues 15–410). Data collection and refinement

471 statistics are shown in Extended Data Table 1. Ramachandran statistics analysed with  
472 MolProbity<sup>58</sup> were 97.8% favoured, 2.2% allowed and 0.0% outliers for oxalate-bound OxIT,  
473 and 97.5% favoured, 2.5% allowed and 0.0% outliers for ligand-free OxIT.

474

#### 475 **Transport assay**

476 Transport activity of OxIT was evaluated by coupling with light-driven inward proton transfer  
477 by xenorhodopsin from *Rubricoccus marinus* (*RmXeR*) co-expressed in *E. coli*<sup>37</sup>. *E. coli*  
478 BL21 (DE3) cells were transformed with pRSF-OxIT<sup>37</sup> and pET21a-*RmXeR*<sup>36</sup> and were  
479 cultured in LB medium containing 100 µg/mL carbenicillin and 50 µg/mL kanamycin at  
480 37 °C. For the mutant OxIT assays, mutations were introduced into the RSF-OxIT vector via  
481 PCR using PrimeSTARMax (Takara Bio). Protein production was induced by adding 1 mM  
482 IPTG and 10 µM all-*trans* retinal (Sigma) at an absorbance of 0.8–0.9 at 600 nm. After  
483 culture at 20 °C for 20 h, *E. coli* cells were collected by centrifugation (3,500 × *g* for 5 min)  
484 and suspended with 50 mM K<sub>2</sub>SO<sub>4</sub> to a cell density at 660 nm of ~10.

485 The light-induced pH change of the cell suspension was monitored with a pH  
486 electrode (LAQUA F-72 pH metre, HORIBA) at 25 °C using continuous stirring. The cell  
487 suspension was first placed in the dark until the pH of the sample stabilised. The sample was  
488 then illuminated using a Xe lamp (MAX-303, Asahi Spectra) through a Sharp Cut Filter Y44  
489 (a longpass filter at ≥ 420 nm, HOYA) for 10 min, and the pH change in the absence of  
490 oxalate ( $\Delta\text{pH}_0$ ) was monitored. The light intensity was adjusted to ~150 mW/cm<sup>2</sup> at 550 nm  
491 using an optical power metre (#3664, Hioki) and an optical sensor (#9742, Hioki). The  
492 illuminated sample was placed back in the dark and when the pH stabilised, 5 mM potassium  
493 oxalate was added to the sample to enable transport via OxIT for 10 min. The sample was  
494 again illuminated under the same condition as above, and the pH change ( $\Delta\text{pH}_s$ ) was  
495 monitored. The transport activity was evaluated by the difference in pH change ( $\Delta\Delta\text{pH}$ )

496 between  $\Delta\text{pH}_s$  and  $\Delta\text{pH}_0$ ; this was further corrected by subtracting the background differential  
497 pH change ( $\Delta\Delta\text{pH}$ ) measured with *E. coli* expressing *RmXeR* alone. The activities for each  
498 mutant were normalised by the corrected  $\Delta\Delta\text{pH}$  and the relative expression level, analysed by  
499 western-blotting using Penta-His Antibody (QIAGEN), of wild-type OxIT measured on the  
500 same day of experiment. We also performed an assay for the Y150A mutant; however, this  
501 mutant affected the expression level of *RmXeR* due to unknown reasons, and we therefore  
502 excluded the Y150A result from this paper.

503

### 504 **Molecular dynamics simulation**

505 The OxIT crystal structures were used as initial structures, with missing residues at the central  
506 loop modelled with MODELLER<sup>59</sup>. Protonation states were analysed using PROPKA 3.1  
507<sup>60,61</sup>, with the default parameter. Based on the analysis, Lys355 exhibits a deviated  $\text{pK}_a$  value  
508 of 7.00 in the outward-facing structure. This deviation was not observed in the occluded  
509 structure ( $\text{pK}_a$  value of 8.61). Thus, both protonation states for Lys355 were considered in the  
510 outward-facing state. The OxIT protein was embedded in the membrane using the Membrane  
511 Builder plugin in CHARMM-GUI<sup>62,63</sup>. A phosphatidylethanolamine bilayer with a length of  
512 120 Å for x and y dimension was used. The protein-membrane system was solvated with  
513 TIP3P water molecules and 150 mM KCl. We replaced  $\text{Cl}^-$  with oxalate ions with  
514 AmberTools17<sup>64</sup>. The final MD system contained 146015 and 143611 atoms for the occluded  
515 and outward-facing OxIT system, respectively. MD simulations were then performed using  
516 NAMD 2.12<sup>65</sup>. The Amber ff14SB and Lipid14 forcefields were employed to describe the  
517 protein and the membrane, respectively<sup>66,67</sup>. The oxalate ligand in solution was described  
518 with parameters determined by the electronic continuum correction with rescaling (ECCR),  
519 based on Ab Initio Molecular Dynamic simulation, developed by Kroutil et al.<sup>41,68</sup>. However,  
520 the oxalate ligand in the binding site of OxIT was described with parameters determined by

521 the original RESP scheme, considering that the protein environment differs from that of water  
522 solution. The MD system was set up with a minimisation for 10,000 steps, heated from 0 to  
523 10 K with a step of 0.1 ns per degree in NVT ensemble, then 10 to 310 K in NPT with a step  
524 of 0.2 ns per 30 degree, and 10 ns of equilibration with NPT ensemble simulation at 310 K.  
525 Then, production runs of 1.0 and 1.7  $\mu$ s in NPT conditions were performed for the occluded  
526 and outward-facing OxIT (for each protonation state of Lys355) system, respectively. A  
527 temperature of 310 K was maintained with the Langevin thermostat, with the pressure set to 1  
528 atmosphere using the Nosé-Hoover Langevin piston. Periodic boundary conditions were  
529 applied, and long-range electrostatic interactions were treated by the particle mesh Ewald  
530 method with a real space cut-off of 12 Å and a switch function at 10 Å.

531 To establish the simulation system with formate, a carboxylate moiety of the  
532 oxalate, toward to the Lys355, in the oxalate-bound occluded structure was replaced by a  
533 hydrogen atom to generate an initial structure of the formate-OxIT complex. GAFF force field  
534 parameters <sup>69</sup> were used for formate. The same equilibration and production protocols as  
535 described above were performed. The full relaxation of the OxIT protein at the end of the  
536 equilibration step guarantees a good adjustment of the binding site for a smaller ligand as well  
537 as a realistic conformation for production runs.

538 The water density during the simulation was calculated by a module from  
539 MDAnalysis <sup>70</sup> after the protein was centred and superimposed.

540

#### 541 **QM/MM calculation**

542 Several QM/MM models were employed with the oxalate-bound structure to assess the  
543 relevance of the binding site environment for the internal conformation of oxalate. First, the  
544 oxalate ligand was assigned to the QM part while the whole protein was assigned to the MM  
545 part. Second, the first shell of residues that interact directly with the ligand, (Gln34, Tyr35,

546 Tyr124, Arg272 and Lys355) were added to the QM part. Third, the second shell of the  
547 binding site (Tyr150, Trp324, Tyr328 and Trp352) were added to the QM part to build a full  
548 binding site environment surrounding the oxalate ligand. All the QM/MM calculations were  
549 performed with ONIOM <sup>71</sup>, implemented in Gaussian 16 <sup>72</sup>. The density functional theory  
550 (DFT) method <sup>73,74</sup> was used to treat the QM region at the B3LYP/6-31+G(d,p) level of  
551 theory <sup>75,76</sup>, including Grimme's dispersion correction with Becke–Johnson damping (D3BJ)  
552 <sup>77</sup>. The MM region of the system was described by the same force field as that in the MD  
553 simulations. The electronic embedding scheme was used such that the MM region polarises  
554 the QM electronic density. An explicit link atom was added between the  $\alpha$  and  $\beta$  carbons for  
555 each residue located in the QM region to handle the covalent boundary between the QM and  
556 MM parts. Minima of the potential energy surface were confirmed by having no imaginary  
557 frequencies. Additional pure DFT calculation of oxalate ligand with fixed side chains of the  
558 binding site residues were performed with the same QM level of theory as in the QM/MM  
559 calculations. As for QM/MM calculations, optimised structures were true energetical minima  
560 without imaginary frequencies.

561

## 562 **Acknowledgements**

563 We thank Yayoi Nomura, Yoshiko Nakada-Nakura, Yumi Sato for technical assistance in the  
564 generation of antibodies, and Drs. Kazuya Hasegawa, Hideo Okumura, Yoshiaki Kawano, and  
565 Kunio Hirata, SPring-8, for X-ray diffraction data collection support. The synchrotron  
566 radiation experiments were performed at the BL41XU and BL32XU of SPring-8 and, with  
567 approvals of the Japan Synchrotron Radiation Research Institute (JASRI) (Proposal No.  
568 2012B1096, 2015A1080, 2015B2080). Computations were partially performed using  
569 Research Center for Computational Science, Okazaki, Japan. This work was financially  
570 supported by JSPS KAKENHI Grant Numbers JP20H03195 (to A.Y.), JP18H02415 (to K.O.),



571 JP26440086 (to T.H.), and Research Fund from Koyanagi Foundation (to A.Y.), Takeda  
572 Science Foundation (to Ta.S.), the Platform Project for Supporting Drug Discovery and Life  
573 Science Research [Basis for Supporting Innovative Drug Discovery and Life Science Research  
574 (BINDS)] from AMED under grant no. JP20am0101079 (to S.I.). The authors would like to  
575 thank Enago ([www.enago.jp](http://www.enago.jp)) for the English language review.

576

### 577 **Author contributions**

578 T.H. and A.Y. conceived the study. Te.S., M.Y., Ta.S., K.H. and N.N. performed protein  
579 purification. N.N., H.I., T.H., and S.I. performed antibody preparation. Te.S., M.Y., A.Y.,  
580 T.H., Ta.S., and K.H. performed crystallization and X-ray data collection. Ta.S., T.H., M.H.,  
581 and A.Y. performed the structure analysis. M.H., K.K., A.Y., and Y.S. performed the  
582 transport assay. T.J.L. and K.O. performed molecular dynamics and QM/MM simulations.  
583 T.T. performed a preliminary molecular dynamics simulation. A.Y., K.O., Ta.S., N.N., T.J.L.,  
584 and M.H. wrote the paper, together with input from all of the other authors.

585

### 586 **Competing interests**

587 The authors declare no competing financial interests.

588

### 589 **References**

- 590 1 Stewart, C. S., Duncan, S. H. & Cave, D. R. Oxalobacter formigenes and its role in  
591 oxalate metabolism in the human gut. *Fems Microbiol Lett* **230**, 1-7 (2004).
- 592 2 Miller, A. W. & Dearing, D. The metabolic and ecological interactions of  
593 oxalate-degrading bacteria in the Mammalian gut. *Pathogens (Basel, Switzerland)* **2**,  
594 636-652 (2013).
- 595 3 Mehta, M., Goldfarb, D. S. & Nazzari, L. The role of the microbiome in kidney stone  
596 formation. *Int J Surg* **36**, 607-612 (2016).
- 597 4 Whittamore, J. M. & Hatch, M. The role of intestinal oxalate transport in

- 598 hyperoxaluria and the formation of kidney stones in animals and man. *Urolithiasis* **45**,  
599 89-108 (2017).
- 600 5 Anantharam, V., Allison, M. J. & Maloney, P. C. Oxalate:formate exchange. The basis  
601 for energy coupling in *Oxalobacter*. *J Biol Chem* **264**, 7244-7250 (1989).
- 602 6 Maloney, P. C., Anantharam, V. & Allison, M. J. Measurement of the substrate  
603 dissociation constant of a solubilized membrane carrier. Substrate stabilization of  
604 OxIT, the anion exchange protein of *Oxalobacter formigenes*. *J Biol Chem* **267**,  
605 10531-10536 (1992).
- 606 7 Ruan, Z. S. *et al.* Identification, purification, and reconstitution of OxIT, the oxalate:  
607 formate antiport protein of *Oxalobacter formigenes*. *J Biol Chem* **267**, 10537-10543  
608 (1992).
- 609 8 Hirai, T. & Subramaniam, S. Structure and transport mechanism of the bacterial  
610 oxalate transporter OxIT. *Biophys J* **87**, 3600-3607 (2004).
- 611 9 Zhang, X. C., Zhao, Y., Heng, J. & Jiang, D. Energy coupling mechanisms of MFS  
612 transporters. *Protein Sci* **24**, 1560-1579 (2015).
- 613 10 Marengo, S. R. & Romani, A. M. Oxalate in renal stone disease: the terminal  
614 metabolite that just won't go away. *Nat Clin Pract Nephrol* **4**, 368-377 (2008).
- 615 11 Massey, L. K. Food oxalate: factors affecting measurement, biological variation, and  
616 bioavailability. *J Am Diet Assoc* **107**, 1191-1194; quiz 1195-1196 (2007).
- 617 12 Allison, M. J., Dawson, K. A., Mayberry, W. R. & Foss, J. G. *Oxalobacter formigenes*  
618 gen. nov., sp. nov.: oxalate-degrading anaerobes that inhabit the gastrointestinal tract.  
619 *Arch Microbiol* **141**, 1-7 (1985).
- 620 13 Sidhu, H. *et al.* Absence of *Oxalobacter formigenes* in cystic fibrosis patients: a risk  
621 factor for hyperoxaluria. *Lancet* **352**, 1026-1029 (1998).
- 622 14 Kumar, R., Ghoshal, U. C., Singh, G. & Mittal, R. D. Infrequency of colonization with  
623 *Oxalobacter formigenes* in inflammatory bowel disease: possible role in renal stone  
624 formation. *J Gastroenterol Hepatol* **19**, 1403-1409 (2004).
- 625 15 Allison, M. J., Cook, H. M., Milne, D. B., Gallagher, S. & Clayman, R. V. Oxalate  
626 degradation by gastrointestinal bacteria from humans. *J Nutr* **116**, 455-460 (1986).
- 627 16 Pajor, A. M. Sodium-coupled dicarboxylate and citrate transporters from the SLC13  
628 family. *Pflugers Arch* **466**, 119-130 (2014).
- 629 17 Pao, S. S., Paulsen, I. T. & Saier, M. H., Jr. Major facilitator superfamily. *Microbiol*  
630 *Mol Biol Rev* **62**, 1-34 (1998).
- 631 18 Abramson, J. *et al.* Structure and mechanism of the lactose permease of *Escherichia*  
632 *coli*. *Science* **301**, 610-615 (2003).

- 633 19 Huang, Y., Lemieux, M. J., Song, J., Auer, M. & Wang, D. N. Structure and  
634 mechanism of the glycerol-3-phosphate transporter from *Escherichia coli*. *Science* **301**,  
635 616-620 (2003).
- 636 20 Jardetzky, O. Simple allosteric model for membrane pumps. *Nature* **211**, 969-970  
637 (1966).
- 638 21 Mitchell, P. A general theory of membrane transport from studies of bacteria. *Nature*  
639 **180**, 134-136 (1957).
- 640 22 Drew, D. & Boudker, O. Shared Molecular Mechanisms of Membrane Transporters.  
641 *Annu Rev Biochem* **85**, 543-572 (2016).
- 642 23 Yan, N. Structural Biology of the Major Facilitator Superfamily Transporters. *Annu*  
643 *Rev Biophys* **44**, 257-283 (2015).
- 644 24 Quistgaard, E. M., Low, C., Guettou, F. & Nordlund, P. Understanding transport by the  
645 major facilitator superfamily (MFS): structures pave the way. *Nat Rev Mol Cell Biol*  
646 **17**, 123-132 (2016).
- 647 25 Drew, D., North, R. A., Nagarathinam, K. & Tanabe, M. Structures and General  
648 Transport Mechanisms by the Major Facilitator Superfamily (MFS). *Chem Rev* **121**,  
649 5289-5335 (2021).
- 650 26 Hirai, T. *et al.* Three-dimensional structure of a bacterial oxalate transporter. *Nat*  
651 *Struct Biol* **9**, 597-600 (2002).
- 652 27 Ihara, M., Matsuura, N. & Yamashita, A. High-resolution Native-PAGE for membrane  
653 proteins capable of fluorescence detection and hydrodynamic state evaluation. *Anal*  
654 *Biochem* **412**, 217-223 (2011).
- 655 28 Fukuda, M. *et al.* Structural basis for dynamic mechanism of nitrate/nitrite antiport by  
656 NarK. *Nat Commun* **6**, 7097 (2015).
- 657 29 Nomura, N. *et al.* Structure and mechanism of the mammalian fructose transporter  
658 GLUT5. *Nature* **526**, 397-401 (2015).
- 659 30 Javadpour, M. M., Eilers, M., Groesbeek, M. & Smith, S. O. Helix packing in  
660 polytopic membrane proteins: role of glycine in transmembrane helix association.  
661 *Biophys J* **77**, 1609-1618 (1999).
- 662 31 Zheng, H., Wisedchaisri, G. & Gonen, T. Crystal structure of a nitrate/nitrite  
663 exchanger. *Nature* **497**, 647-651 (2013).
- 664 32 Dean, P. A. W. The Oxalate Dianion, C<sub>2</sub>O<sub>4</sub><sup>2-</sup>: Planar or Nonplanar? *J Chem Educ* **89**,  
665 417-418 (2012).
- 666 33 Fu, D., Sarker, R. I., Abe, K., Bolton, E. & Maloney, P. C. Structure/function  
667 relationships in OxIT, the oxalate-formate transporter of *oxalobacter formigenes*.

- 668 Assignment of transmembrane helix 11 to the translocation pathway. *J Biol Chem* **276**,  
669 8753-8760 (2001).
- 670 34 Yang, Q. *et al.* Experimental tests of a homology model for OxIT, the oxalate  
671 transporter of *Oxalobacter formigenes*. *Proc Natl Acad Sci U S A* **102**, 8513-8518  
672 (2005).
- 673 35 Wang, X., Sarker, R. I. & Maloney, P. C. Analysis of substrate-binding elements in  
674 OxIT, the oxalate:formate antiporter of *Oxalobacter formigenes*. *Biochemistry* **45**,  
675 10344-10350 (2006).
- 676 36 Inoue, S. *et al.* Spectroscopic characteristics of *Rubricoccus marinus* xenorhodopsin  
677 (RmXeR) and a putative model for its inward H(+) transport mechanism. *Phys Chem*  
678 *Chem Phys* **20**, 3172-3183 (2018).
- 679 37 Hayashi, M., Kojima, K., Sudo, Y. & Yamashita, A. An optogenetic assay method for  
680 electrogenic transporters using *Escherichia coli* co-expressing light-driven proton  
681 pump. *Protein Sci* **30**, 2161-2169 (2021).
- 682 38 Okazaki, K. I. *et al.* Mechanism of the electroneutral sodium/proton antiporter PaNhaP  
683 from transition-path shooting. *Nat Commun* **10**, 1742 (2019).
- 684 39 Koziolk, M. *et al.* Investigation of pH and Temperature Profiles in the GI Tract of  
685 Fasted Human Subjects Using the Intellicap((R)) System. *J Pharm Sci* **104**, 2855-2863  
686 (2015).
- 687 40 Feng, J., Selvam, B. & Shukla, D. How do antiporters exchange substrates across the  
688 cell membrane? An atomic-level description of the complete exchange cycle in NarK.  
689 *Structure* **29**, 922-933 e923 (2021).
- 690 41 Kroutil, O., Predota, M. & Kabelac, M. Force field parametrization of  
691 hydrogenoxalate and oxalate anions with scaled charges. *J Mol Model* **23**, 327 (2017).
- 692 42 Stelzl, L. S., Fowler, P. W., Sansom, M. S. & Beckstein, O. Flexible gates generate  
693 occluded intermediates in the transport cycle of LacY. *J Mol Biol* **426**, 735-751  
694 (2014).
- 695 43 Blum, M. *et al.* The InterPro protein families and domains database: 20 years on.  
696 *Nucleic Acids Res* **49**, D344-D354 (2021).
- 697 44 Fu, D. & Maloney, P. C. Evaluation of secondary structure of OxIT, the oxalate  
698 transporter of *Oxalobacter formigenes*, by circular dichroism spectroscopy. *J Biol*  
699 *Chem* **272**, 2129-2135 (1997).
- 700 45 Jaenecke, F. *et al.* Generation of Conformation-Specific Antibody Fragments for  
701 Crystallization of the Multidrug Resistance Transporter MdfA. *Methods Mol Biol*  
702 **1700**, 97-109 (2018).

- 703 46 Suharni *et al.* Proteoliposome-based selection of a recombinant antibody fragment  
704 against the human M2 muscarinic acetylcholine receptor. *Monoclon Antib*  
705 *Immunodiagn Immunother* **33**, 378-385 (2014).
- 706 47 Nomura, Y. *et al.* The intervening removable affinity tag (iRAT) production system  
707 facilitates Fv antibody fragment-mediated crystallography. *Protein Sci* **25**, 2268-2276  
708 (2016).
- 709 48 Yamashita, K., Hirata, K. & Yamamoto, M. KAMO: towards automated data  
710 processing for microcrystals. *Acta Crystallogr D Struct Biol* **74**, 441-449 (2018).
- 711 49 Foadi, J. *et al.* Clustering procedures for the optimal selection of data sets from  
712 multiple crystals in macromolecular crystallography. *Acta Crystallogr D Biol*  
713 *Crystallogr* **69**, 1617-1632 (2013).
- 714 50 Kabsch, W. Xds. *Acta Crystallogr D Biol Crystallogr* **66**, 125-132 (2010).
- 715 51 Kabsch, W. Integration, scaling, space-group assignment and post-refinement. *Acta*  
716 *Crystallogr D Biol Crystallogr* **66**, 133-144 (2010).
- 717 52 Tickle, I. J., Flensburg, C., Keller, P., Paciorek, W., Sharff, A., Vornrhein, C., Bricogne,  
718 G. *STARANISO* (<http://staraniso.globalphasing.org/cgi-bin/staraniso.cgi>), 2018).
- 719 53 McCoy, A. J. *et al.* Phaser crystallographic software. *J Appl Crystallogr* **40**, 658-674  
720 (2007).
- 721 54 Schuermann, J. P., Prewitt, S. P., Davies, C., Deutscher, S. L. & Tanner, J. J. Evidence  
722 for structural plasticity of heavy chain complementarity-determining region 3 in  
723 antibody-ssDNA recognition. *J Mol Biol* **347**, 965-978 (2005).
- 724 55 Sato, Y. *et al.* A Genetically Encoded Probe for Live-Cell Imaging of H4K20  
725 Monomethylation. *J Mol Biol* **428**, 3885-3902 (2016).
- 726 56 Emsley, P., Lohkamp, B., Scott, W. G. & Cowtan, K. Features and development of  
727 Coot. *Acta Crystallogr D Biol Crystallogr* **66**, 486-501 (2010).
- 728 57 Adams, P. D. *et al.* PHENIX: a comprehensive Python-based system for  
729 macromolecular structure solution. *Acta Crystallogr D Biol Crystallogr* **66**, 213-221  
730 (2010).
- 731 58 Davis, I. W. *et al.* MolProbity: all-atom contacts and structure validation for proteins  
732 and nucleic acids. *Nucleic Acids Res* **35**, W375-383 (2007).
- 733 59 Webb, B. & Sali, A. Comparative Protein Structure Modeling Using MODELLER.  
734 *Curr Protoc Bioinformatics* **54**, 5 6 1-5 6 37 (2016).
- 735 60 Sondergaard, C. R., Olsson, M. H., Rostkowski, M. & Jensen, J. H. Improved  
736 Treatment of Ligands and Coupling Effects in Empirical Calculation and  
737 Rationalization of pKa Values. *J Chem Theory Comput* **7**, 2284-2295 (2011).

- 738 61 Olsson, M. H., Sondergaard, C. R., Rostkowski, M. & Jensen, J. H. PROPKA3:  
739 Consistent Treatment of Internal and Surface Residues in Empirical pKa Predictions. *J*  
740 *Chem Theory Comput* **7**, 525-537 (2011).
- 741 62 Jo, S., Kim, T., Iyer, V. G. & Im, W. CHARMM-GUI: a web-based graphical user  
742 interface for CHARMM. *J Comput Chem* **29**, 1859-1865 (2008).
- 743 63 Wu, E. L. *et al.* CHARMM-GUI Membrane Builder toward realistic biological  
744 membrane simulations. *J Comput Chem* **35**, 1997-2004 (2014).
- 745 64 AMBER 2017 (University of California, San Francisco, 2017).
- 746 65 Phillips, J. C. *et al.* Scalable molecular dynamics on CPU and GPU architectures with  
747 NAMD. *J Chem Phys* **153**, 044130 (2020).
- 748 66 Maier, J. A. *et al.* ff14SB: Improving the Accuracy of Protein Side Chain and  
749 Backbone Parameters from ff99SB. *J Chem Theory Comput* **11**, 3696-3713 (2015).
- 750 67 Dickson, C. J. *et al.* Lipid14: The Amber Lipid Force Field. *J Chem Theory Comput*  
751 **10**, 865-879 (2014).
- 752 68 Kroutil, O., Minofar, B. & Kabelac, M. Structure and dynamics of solvated  
753 hydrogenoxalate and oxalate anions: a theoretical study. *J Mol Model* **22**, 210 (2016).
- 754 69 Wang, J., Wolf, R. M., Caldwell, J. W., Kollman, P. A. & Case, D. A. Development  
755 and testing of a general amber force field. *J Comput Chem* **25**, 1157-1174 (2004).
- 756 70 Michaud-Agrawal, N., Denning, E. J., Woolf, T. B. & Beckstein, O. MDAAnalysis: a  
757 toolkit for the analysis of molecular dynamics simulations. *J Comput Chem* **32**,  
758 2319-2327 (2011).
- 759 71 Chung, L. W. *et al.* The ONIOM Method and Its Applications. *Chem Rev* **115**,  
760 5678-5796 (2015).
- 761 72 Gaussian 16, Revision C.01 (Gaussian, Inc., Wallingford CT, 2016).
- 762 73 Hohenberg, P. & Kohn, W. Inhomogeneous Electron Gas. *Physical Review* **136**,  
763 B864-B871 (1964).
- 764 74 Kohn, W. & Sham, L. J. Self-Consistent Equations Including Exchange and  
765 Correlation Effects. *Physical Review* **140**, A1133-A1138 (1965).
- 766 75 Becke, A. D. Density-functional thermochemistry. III. The role of exact exchange. *The*  
767 *Journal of Chemical Physics* **98**, 5648-5652 (1993).
- 768 76 Lee, C., Yang, W. & Parr, R. G. Development of the Colle-Salvetti correlation-energy  
769 formula into a functional of the electron density. *Phys Rev B Condens Matter* **37**,  
770 785-789 (1988).
- 771 77 Grimme, S., Ehrlich, S. & Goerigk, L. Effect of the damping function in dispersion  
772 corrected density functional theory. *J Comput Chem* **32**, 1456-1465 (2011).

- 773 78 Pei, J., Kim, B. H. & Grishin, N. V. PROMALS3D: a tool for multiple protein  
774 sequence and structure alignments. *Nucleic Acids Res* **36**, 2295-2300 (2008).  
775 79 Robert, X. & Gouet, P. Deciphering key features in protein structures with the new  
776 ENDscript server. *Nucleic Acids Res* **42**, W320-324 (2014).  
777

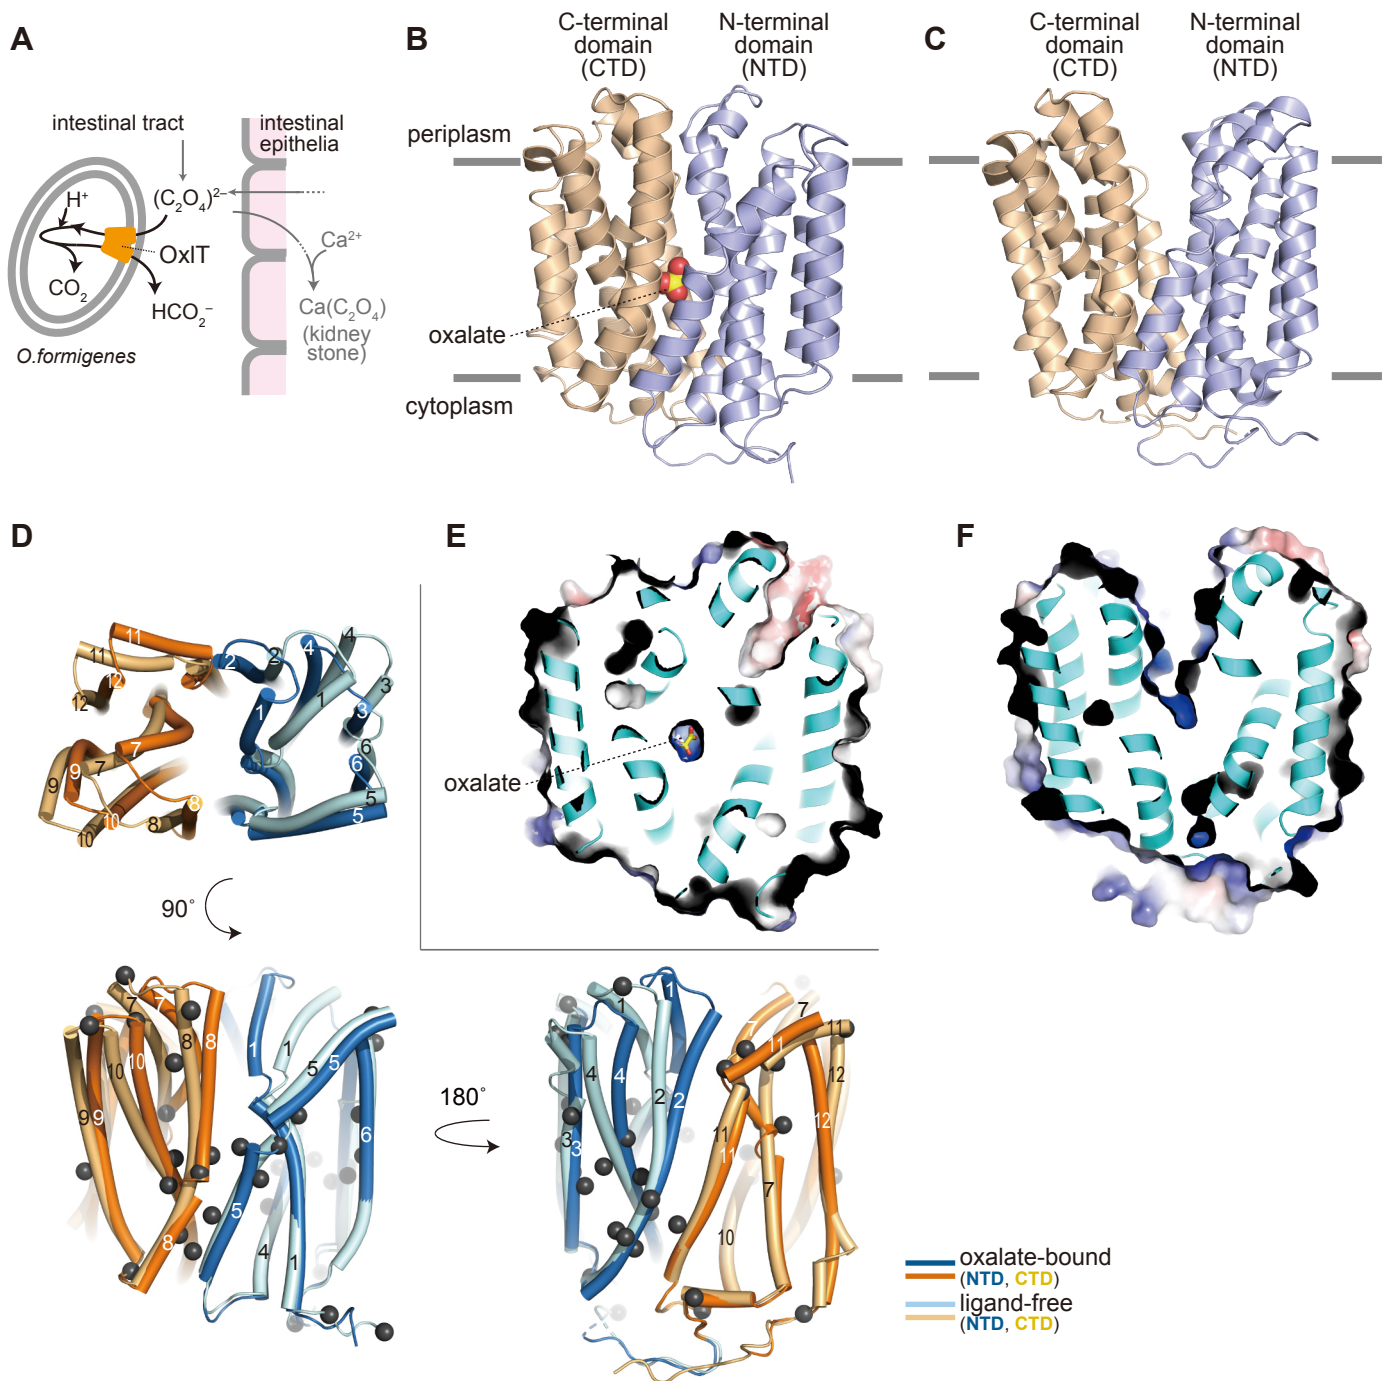

**Fig. 1.** Structure of OxIT. (A) Schematic drawing of OxIT function in the oxalate-degrading bacterium, *O. formigenes*, in the gut. (B, C) Crystal structures of the oxalate-bound (B) and ligand-free (C) OxIT; (D) Superposition of oxalate-bound and ligand-free OxIT. A view from the periplasm (top) and two views in the transmembrane plane (bottom) are shown. Dark grey spheres indicate  $\text{C}\alpha$  atoms of glycine residues. (E, F) Surface electrostatic potential map of oxalate-bound (E) and ligand-free (F) OxIT. Electrostatic potentials at  $\pm 5 \text{ kTe}^{-1}$  were mapped on the surfaces.



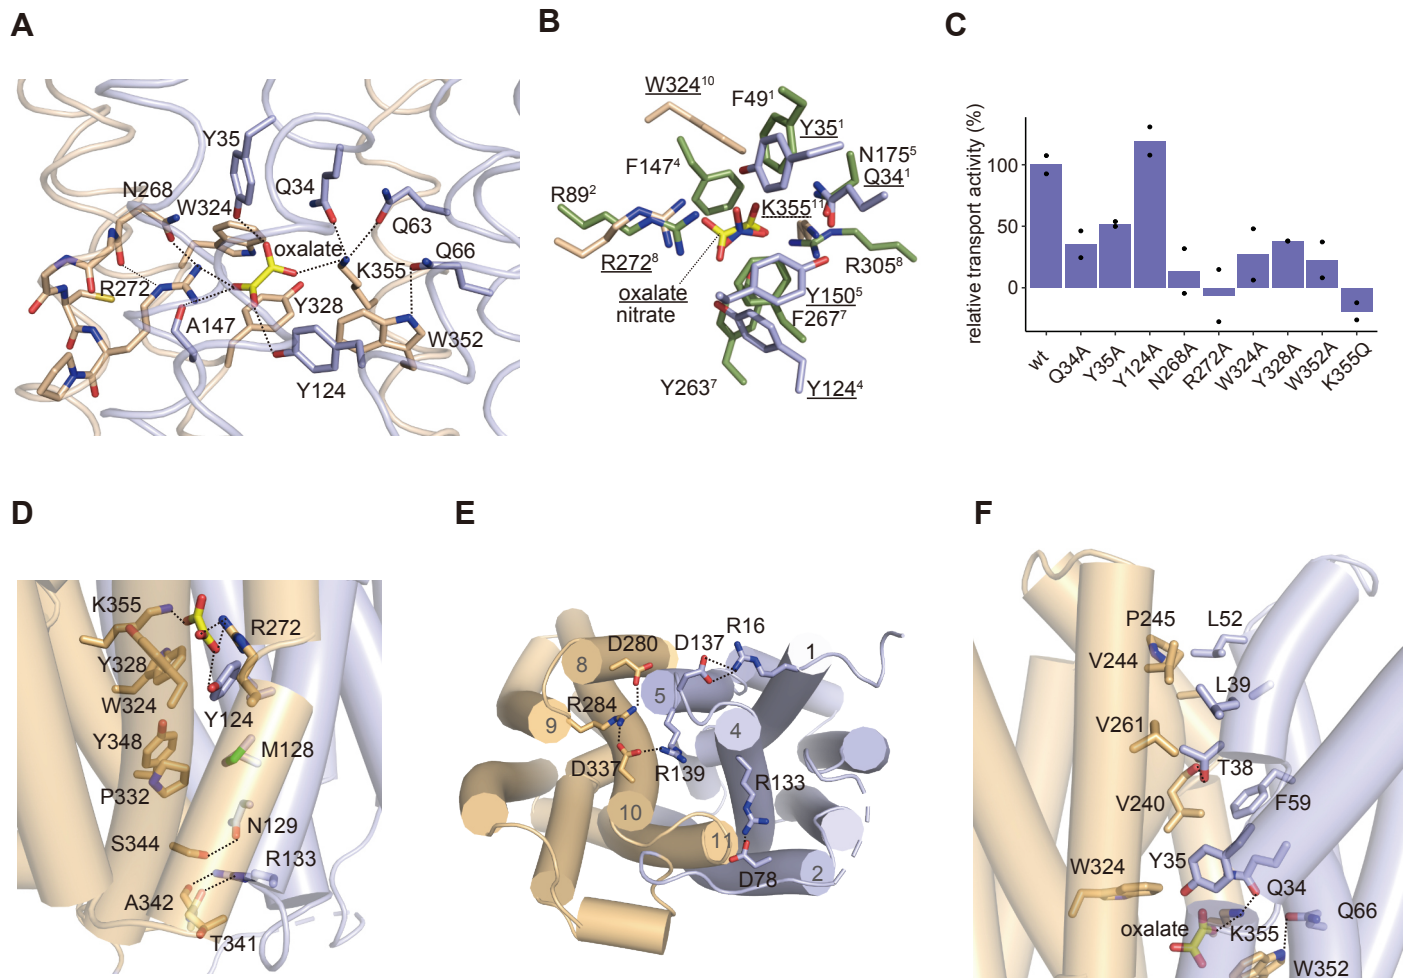

**Fig. 2.** Oxalate-bound occluded OxIT structure. (A) Close up of the binding site in oxalate-bound OxIT. The domain colour coding is as in Fig. 1B. Dashed lines indicate potential hydrogen or ionic bonds. (B) Superposition of the substrate-binding site structures of OxIT and NarK (PDB ID: 4U4W) based on the topological similarity of the amino acid residues interacting with the substrates. OxIT is shown in the same colour coding as panel A with the underlined labels while NarK is shown in green with normal labels. The superscript for a residue label is the TM helix numbering where the residue locates. (C) Transport activities of the mutant OxIT relative to that of wild-type OxIT. The results of the R272A and K355Q mutants<sup>37</sup> are reposted for comparison. (D) Interdomain interactions closing the cavity to cytoplasm. (E) Ionic interaction network at the cytoplasmic side of OxIT. (F) Interdomain interactions closing the cavity to periplasm.

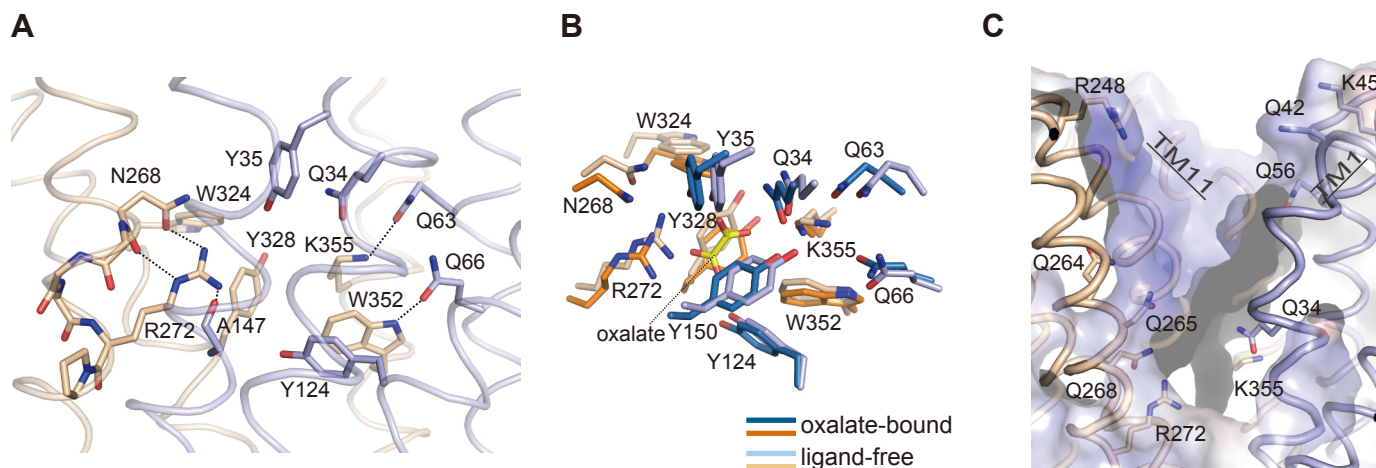

**Fig. 3.** Ligand-free outward-facing OxIT structure. (A) Close up of the binding site in ligand-free OxIT viewed from the same orientation in Fig. 2A. The domain colour coding is as in 1C. The dashed lines indicate potential hydrogen bonds. (B) Superposition of the substrate-binding site structures of OxIT in oxalate-bound and ligand-free forms. (C) Close up of the cavity open to the periplasm. Models of polar residues exposed to the cavity and the surface coloured with the electrostatic potential map as in Fig. 1F are also shown. In panels A–C, the molecule defined as chain A is shown as a representative.

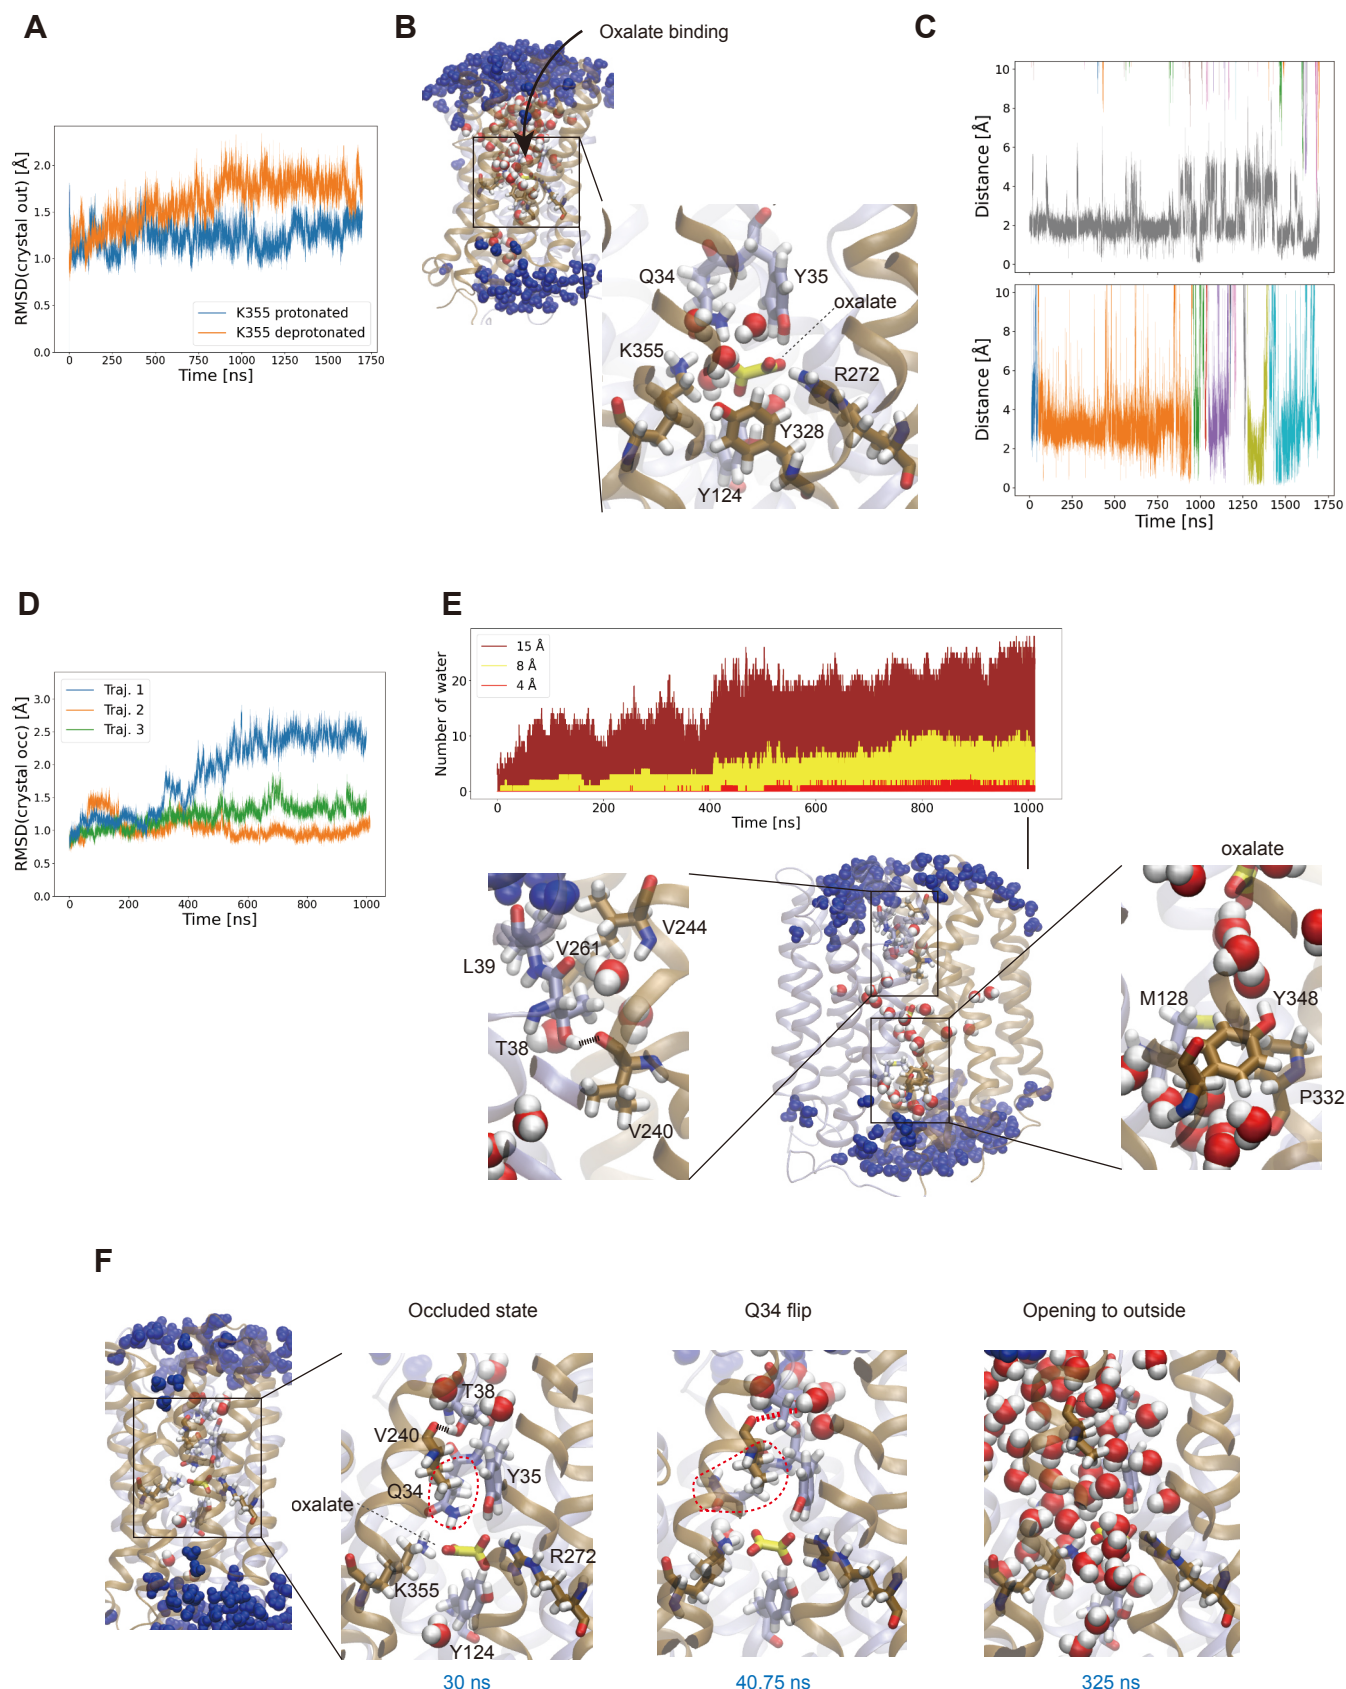

**Fig. 4.** Substrate-binding and conformational dynamics of OxIT. (A–C) MD simulations started from the ligand-free outward-facing OxIT crystal structure. (A) RMSDs from the initial outward-facing crystal structure are shown for two trajectories with different protonation states of Lys355 in different colours. (B) Snapshot of the spontaneously bound oxalate to OxIT with protonated Lys355. In the zoom-out snapshot, water molecules within 15 Å of the oxalate ion are in the CPK colour while those between 15 and 25 Å are in blue. In the close up snapshot, water molecules within 4 Å distance from the oxalate ion are shown. (C) Time series of the distance between the oxalate ions and the binding site residues with protonated and deprotonated Lys355 are in the top and bottom panels, respectively. Different colours represent different oxalate ions. (To be continued.)

**Fig. 4.** (Continued.) (D–F) MD simulations started from the oxalate-bound occluded OxIT crystal structure. (D) RMSDs from the initial occluded crystal structure are shown for three independent trajectories in different colours. (E) Hydrophobic gates of OxIT. Top panel: the numbers of water molecules within 15, 8 and 4 Å from the bound oxalate ion are plotted in brown, yellow and red, respectively. Bottom panel: a snapshot at 1000 ns is shown in the zoom-out and close up views. Water molecules within 15 Å are in the CPK colour while those between 15 and 25 Å are in blue. (F) The observed transition from the occluded to the outward-facing conformation triggered by the Gln34 flip. The oxalate ion and binding site residues are represented as sticks. Gln34 is highlighted with the red circle. Water molecules are shown in the van der Waals representation. CPK-coloured water molecules are within 15 Å from the oxalate ion while the blue ones between 15 and 25 Å from the oxalate ion. The broken lines between the Thr38 side chain and the Val240 main chain in black and red depict the distances those within or out of H-bonding, respectively.

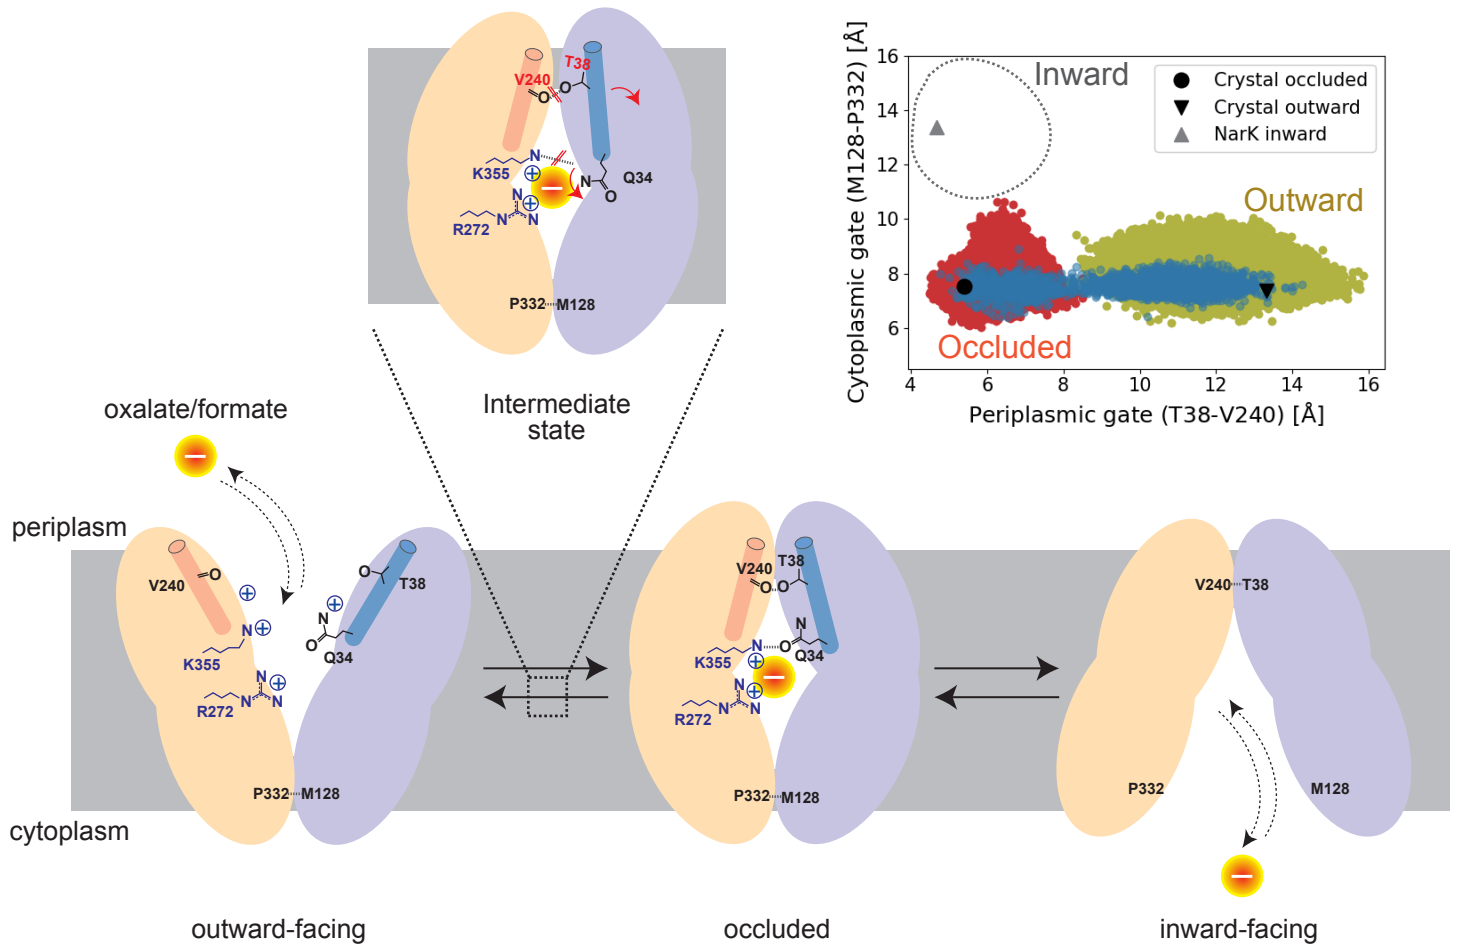

**Fig. 5.** Schematic drawing of the transport process and conformational switching of OxIT. The conformational landscape of OxIT along the periplasmic and cytoplasmic gate distances is shown in the top right panel. The  $C\alpha$  distances of the gate residues in MD simulations of the occluded and outward-open states and Gln34-induced transition are shown in red, yellow and blue, respectively. The gate-residue distances in the current occluded and outward-facing crystal structures as well as the NarK inward-facing crystal structure (PDB ID: 4U4T) are also shown.

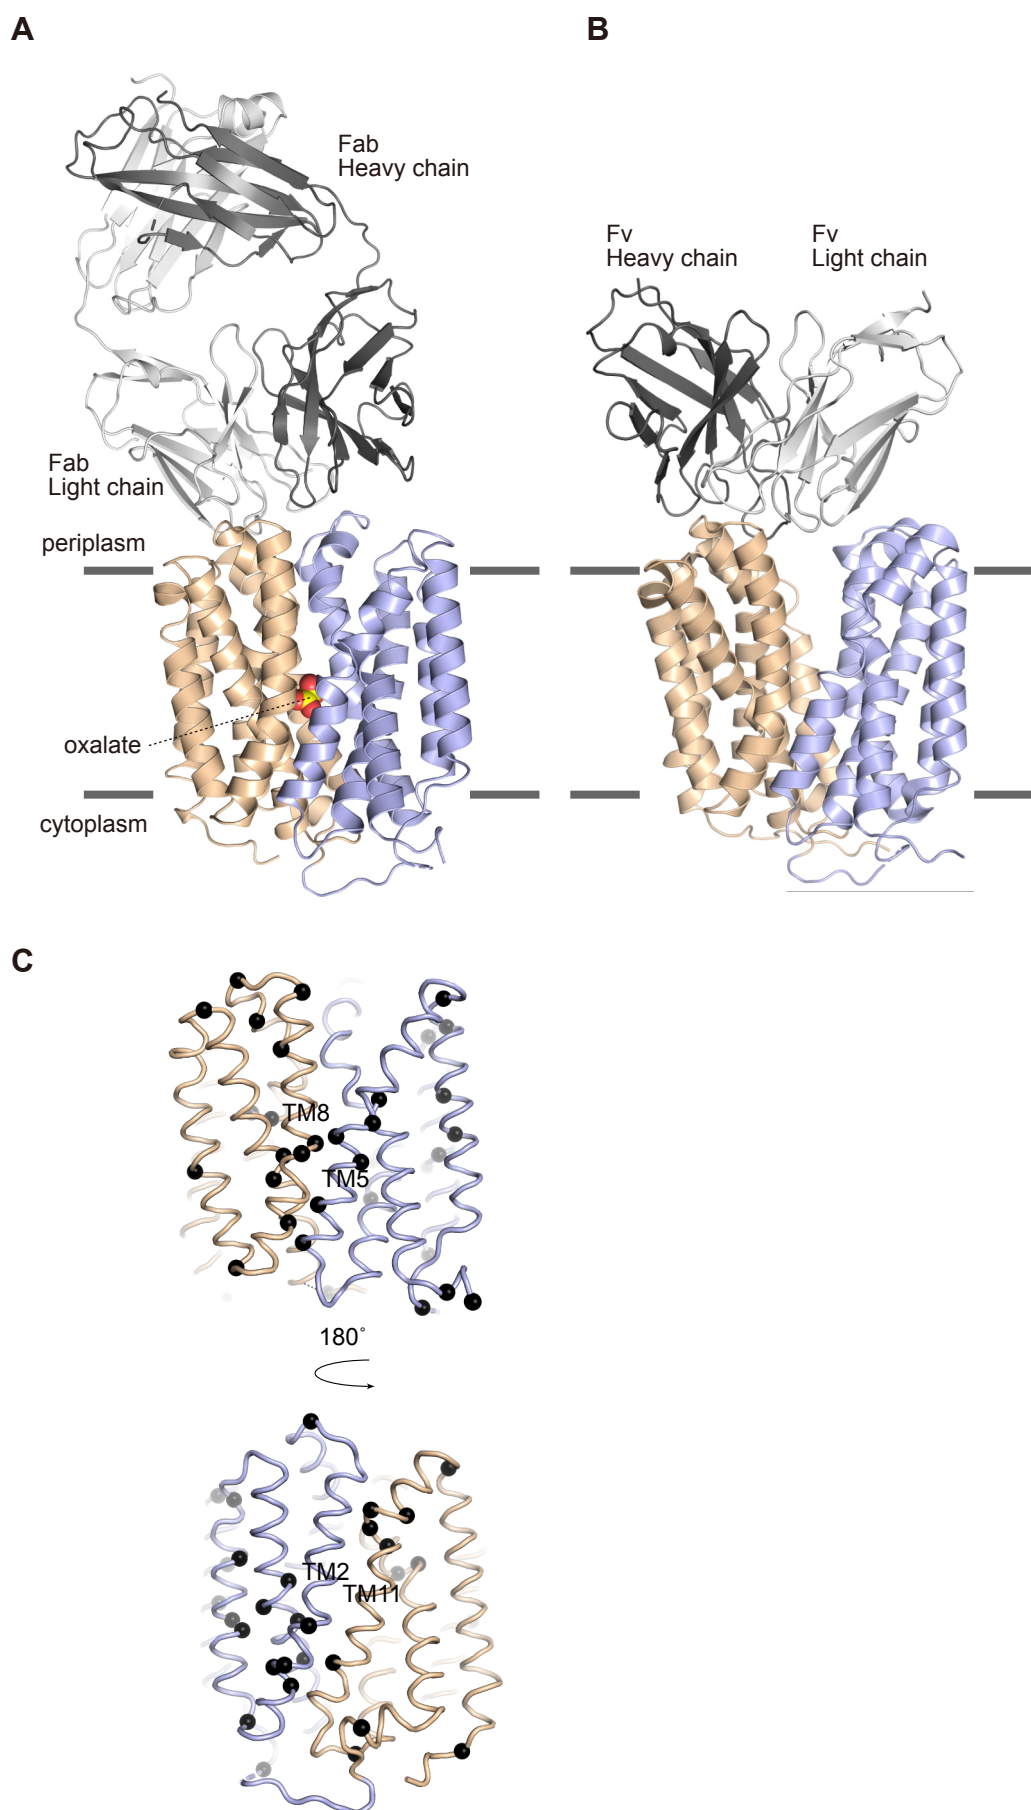

**Extended Data Fig. 1.** Structure of OxIT. (A) The oxalate-bound OxIT in complex with an Fab fragment (D5901Fab) and (B) the ligand-free OxIT in complex with an Fv fragment (20D033Fv). (C) Positions of the glycine residues mapped on the occluded OxIT structure, viewed from two different orientations. The black spheres indicate the C $\alpha$  atoms of glycine residues.

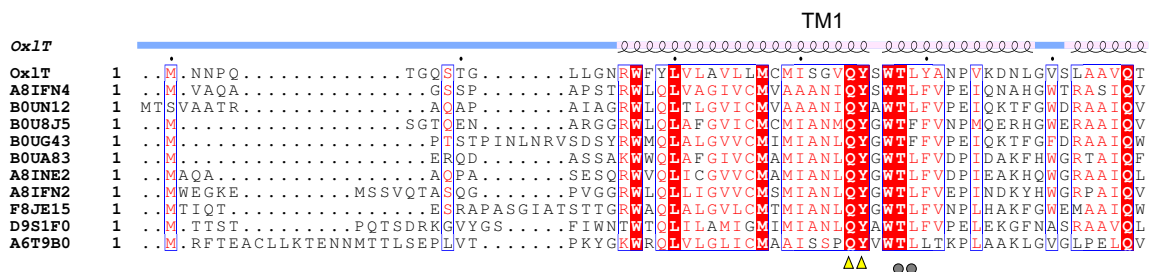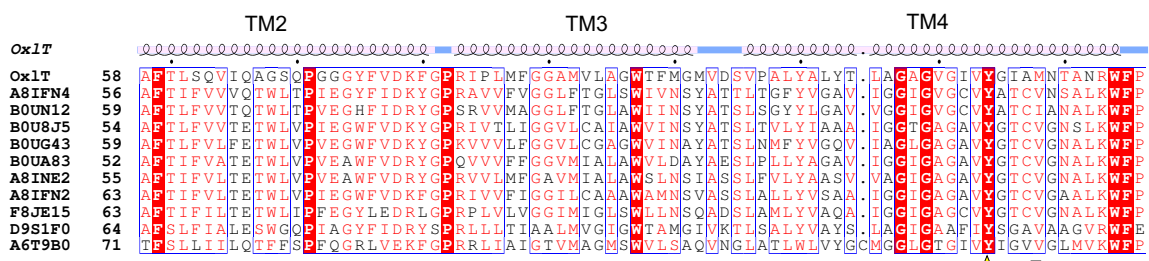

*Motif-A like*

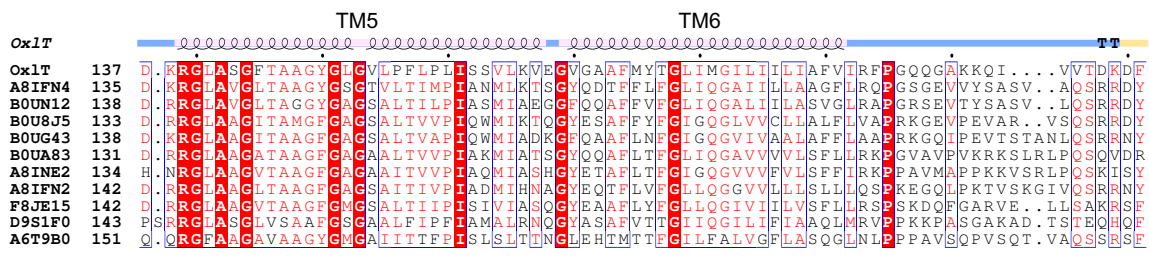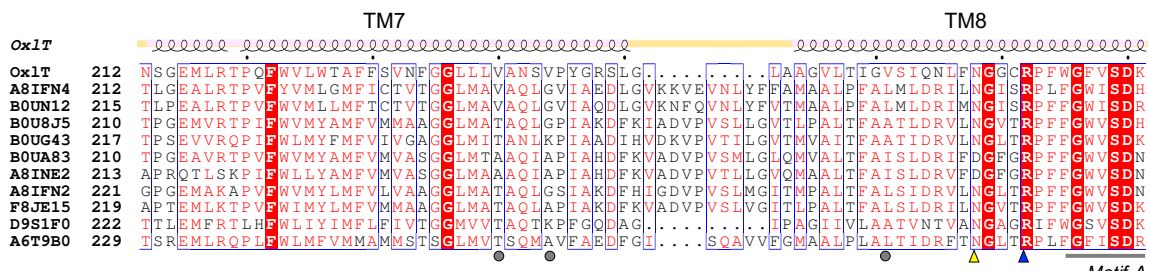

*Motif-A*

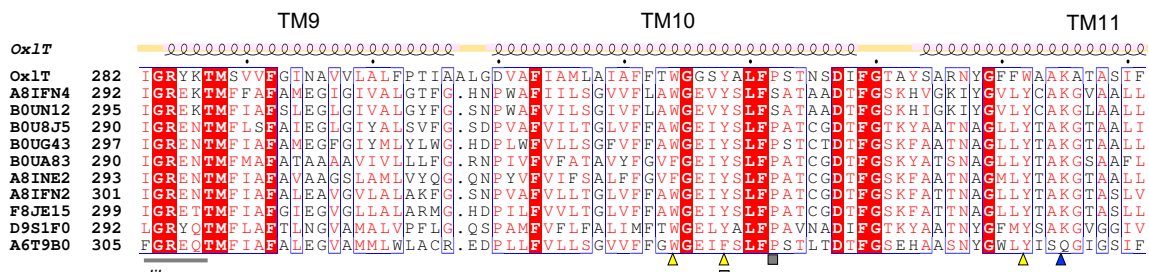

*like*

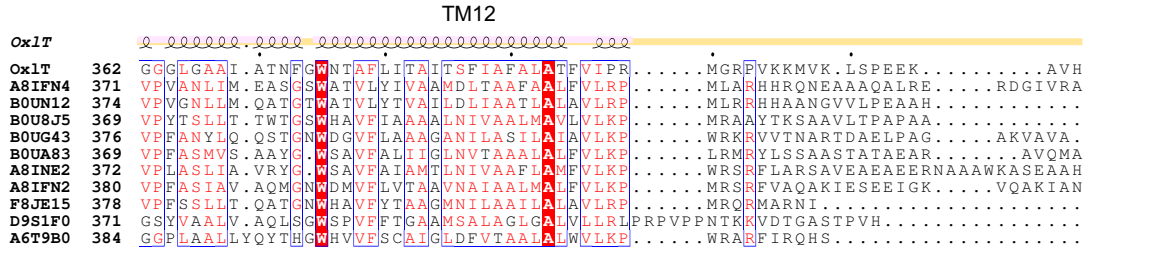

▲: oxalate-binding ●: periplasmic-gating ■: cytoplasmic-gating

**Extended Data Fig. 2**

**Extended Data Fig. 2.** Amino acid sequence alignment of the OFA family proteins in MFS and the secondary structures of OxIT. Ten entries from oxalate/formate antiporter (InterPro <sup>43</sup> 026355) were aligned via the structure-based sequence using PROMALS3D <sup>78</sup>; the alignment was drawn by the ESPript3.0 server (<https://esprpt.ibcp.fr>) <sup>79</sup>. Note, all entries except of OxIT are uncharacterised.



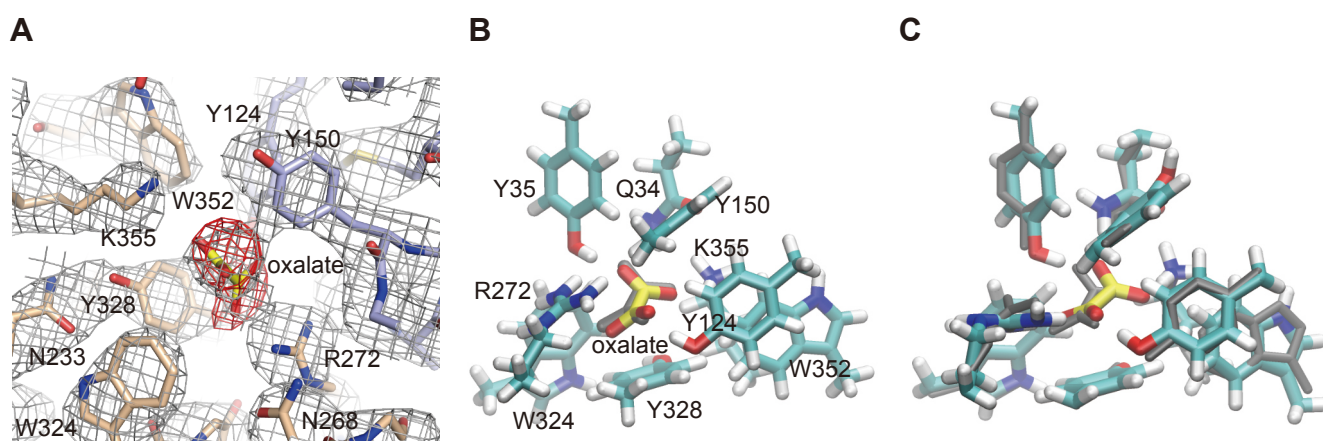

**Extended Data Fig. 3.** Oxalate binding at the occluded OxIT. (A) Simulated-annealing omit map of for the bound oxalate molecule, shown in red at  $3.5 \sigma$ .  $2F_o - F_c$  map at the binding site in grey at  $1.5 \sigma$  is also shown. (B) The QM-calculated structure of the oxalate binding site at the occluded OxIT. Binding site residues were set frozen, whereas the oxalate molecule was set free. The oxalate ion in the crystal structure is shown in grey. (C) The QM/MM-calculated structure of the oxalate binding site at the occluded OxIT. The QM/MM calculation was performed by applying the oxalate and neighbouring nine residues for QM and the other part of the transporter for MM calculation. Slight rearrangement of the residues in the binding site was observed from the crystal structure shown in grey, such as an additional H-bond formation with Gln34 and the oxalate.

**A**

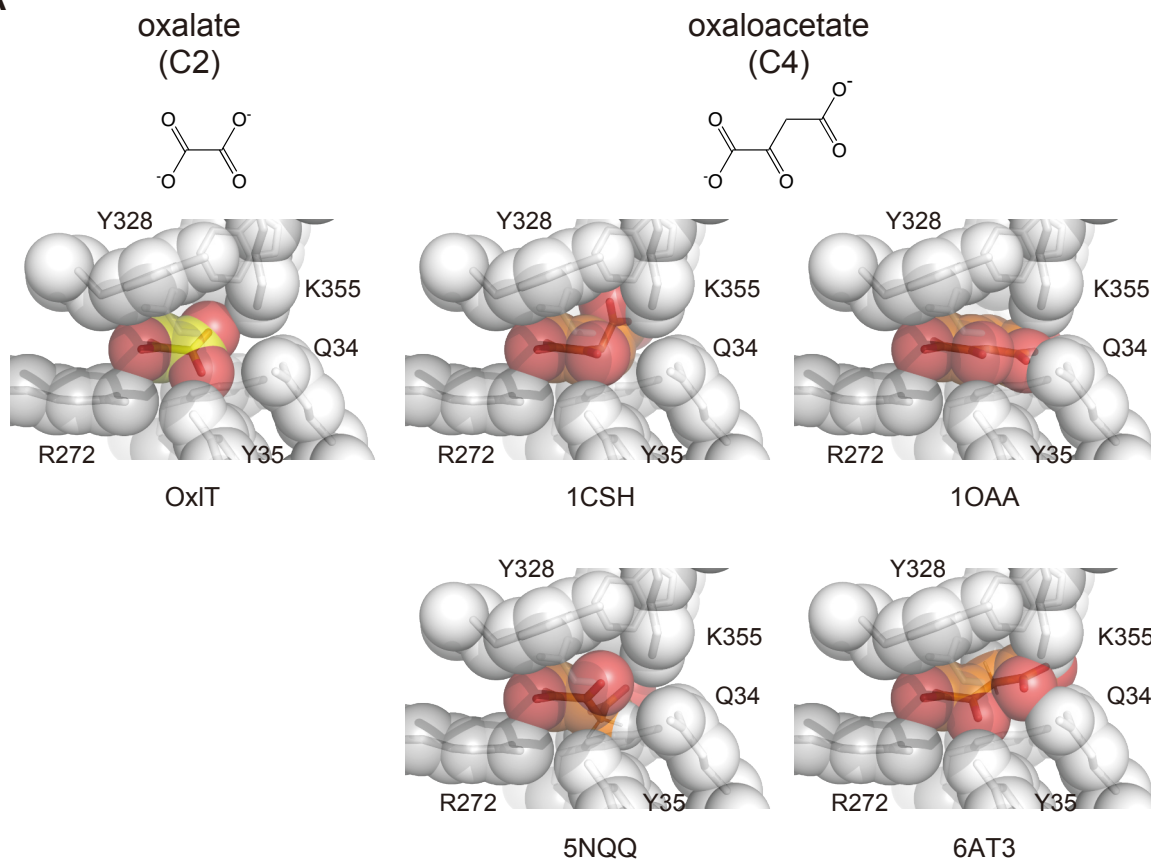

**B**

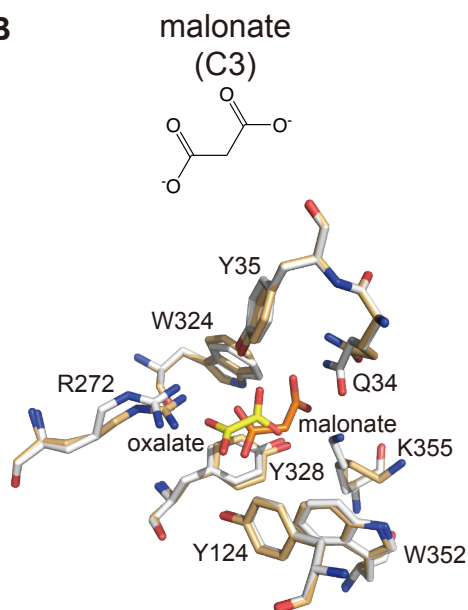

**Extended Data Fig. 4.** Presumed binding of different carboxylates at the substrate-binding site in OxIT. (A) The models of oxalate, the C4 dicarboxylate, and oxaloacetate, a C4 dicarboxylate intermediate in the Krebs cycle, bound to the occluded OxIT, coloured white. The oxaloacetate models with several different representative conformers observed in the PDB were simply supplanted with oxalate in the crystal structure; van der Waals surfaces are shown as spheres. (B) Docking model of the malonate-bound OxIT (OxIT, light orange; malonate, orange), superposed to the crystal structure of the oxalate-bound OxIT (OxIT, white; oxalate, yellow).

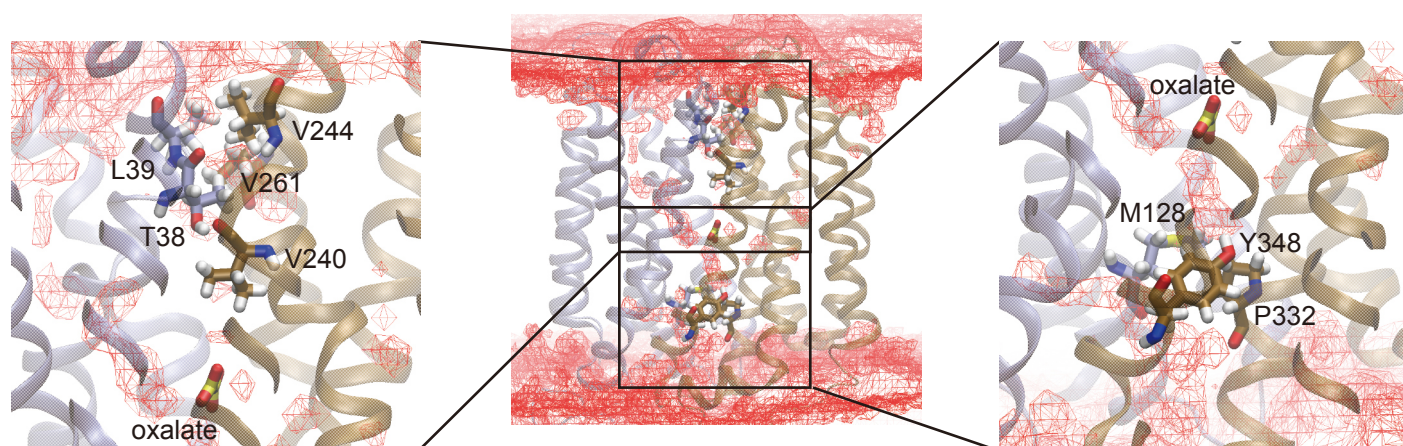

**Extended Data Fig. 5.** Water density in the occluded state during the simulation. The iso-surface of the relative density value of 0.5 to the bulk water is shown in red wires.

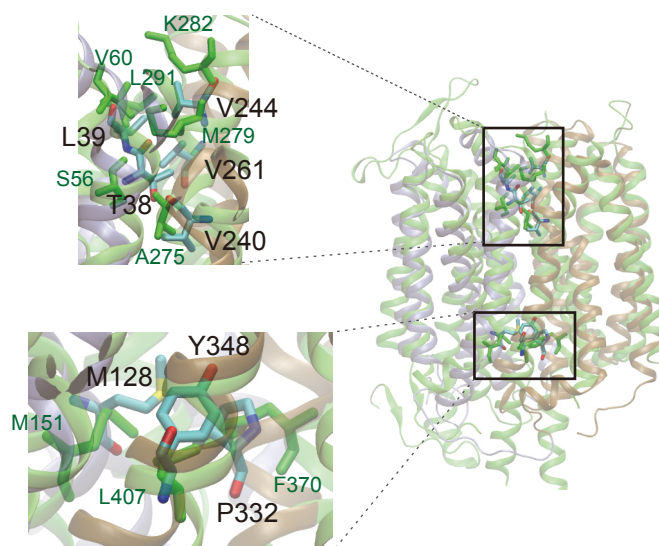

**Extended Data Fig. 6.** Structural alignment of OxIT and NarK. The NarK transporter is in green. Residues in OxIT and NarK located at similar positions are labelled in black and green, respectively. The NarK periplasmic gate consists of Ser56 and Val60 in TM1, Ala275 and Met279 in TM7 and Leu291 in TM8, whereas the NarK cytoplasmic gate consists of Met151 in TM4, Phe370 in TM10 and Leu407 in TM11 <sup>40</sup>.

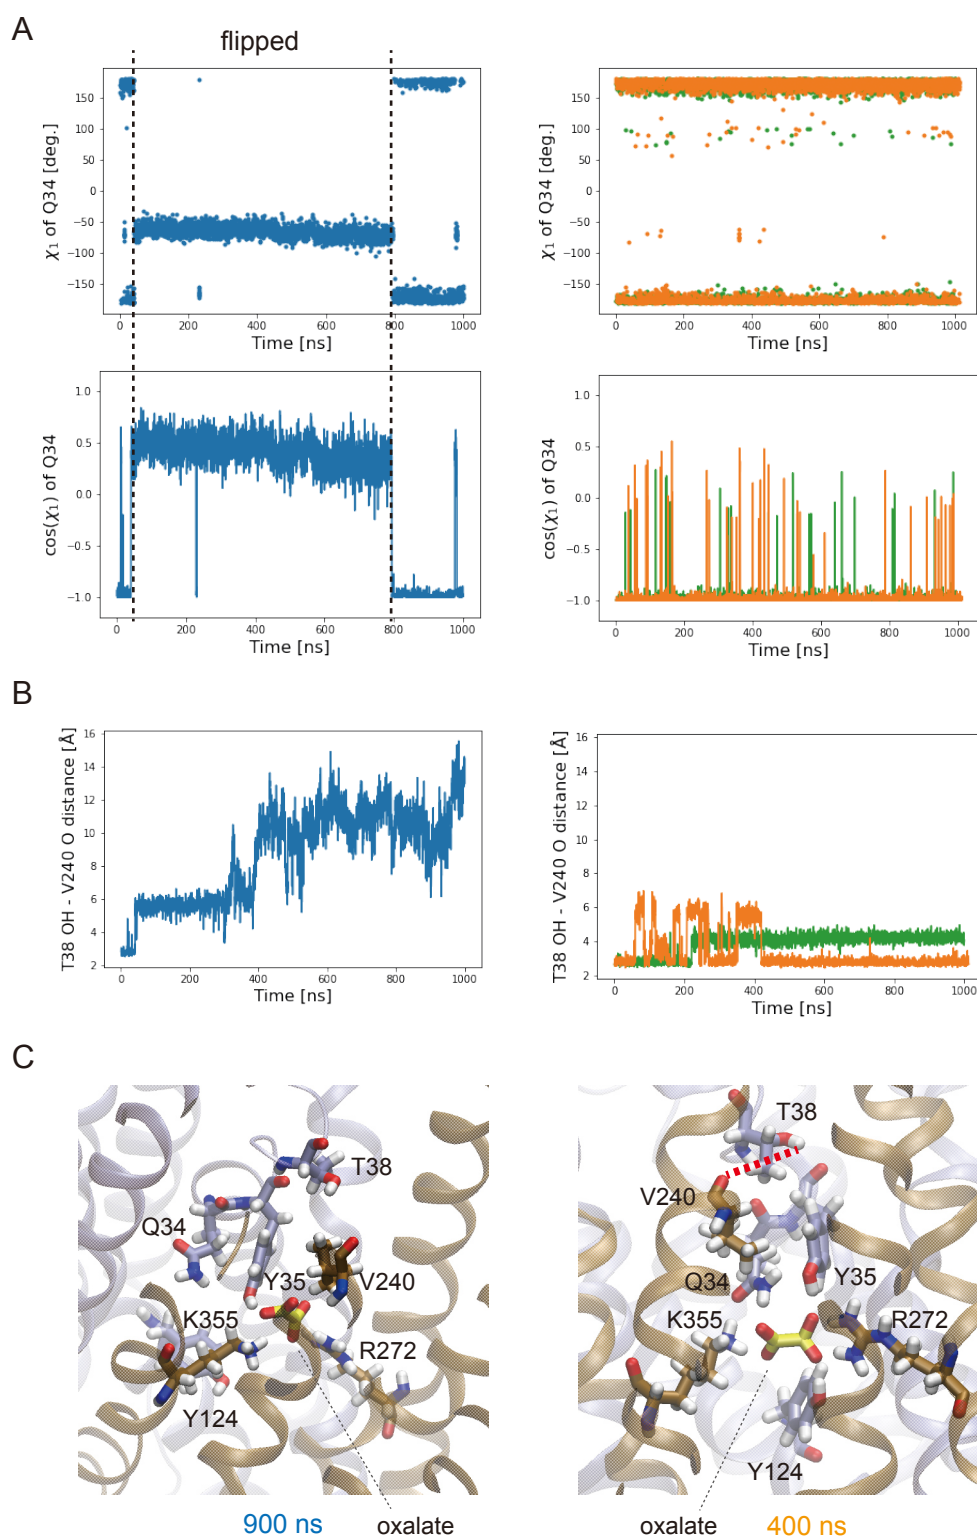

**Extended Data Fig. 7.** Gln34 side chain and hydrogen bond between Thr38 and Val240 in the simulation from the occluded conformation with oxalate. (A) The side chain dihedral  $\chi_1$  of Gln34 is shown for three independent trajectories with different colours. The flip of Gln34 side chain can be characterised by the change of the side chain dihedral  $\chi_1$ . (B) The hydrogen bond donor and acceptor distance between Thr38 and Val240 is shown for three independent trajectories with different colours. (C) Snapshots of the binding site are shown. Data are derived from trajectories shown in Fig. 4D; the results from the trajectory with conformational transition (in blue) and the other two without conformational transition (in orange and green) are shown in the left and right subpanels, respectively.

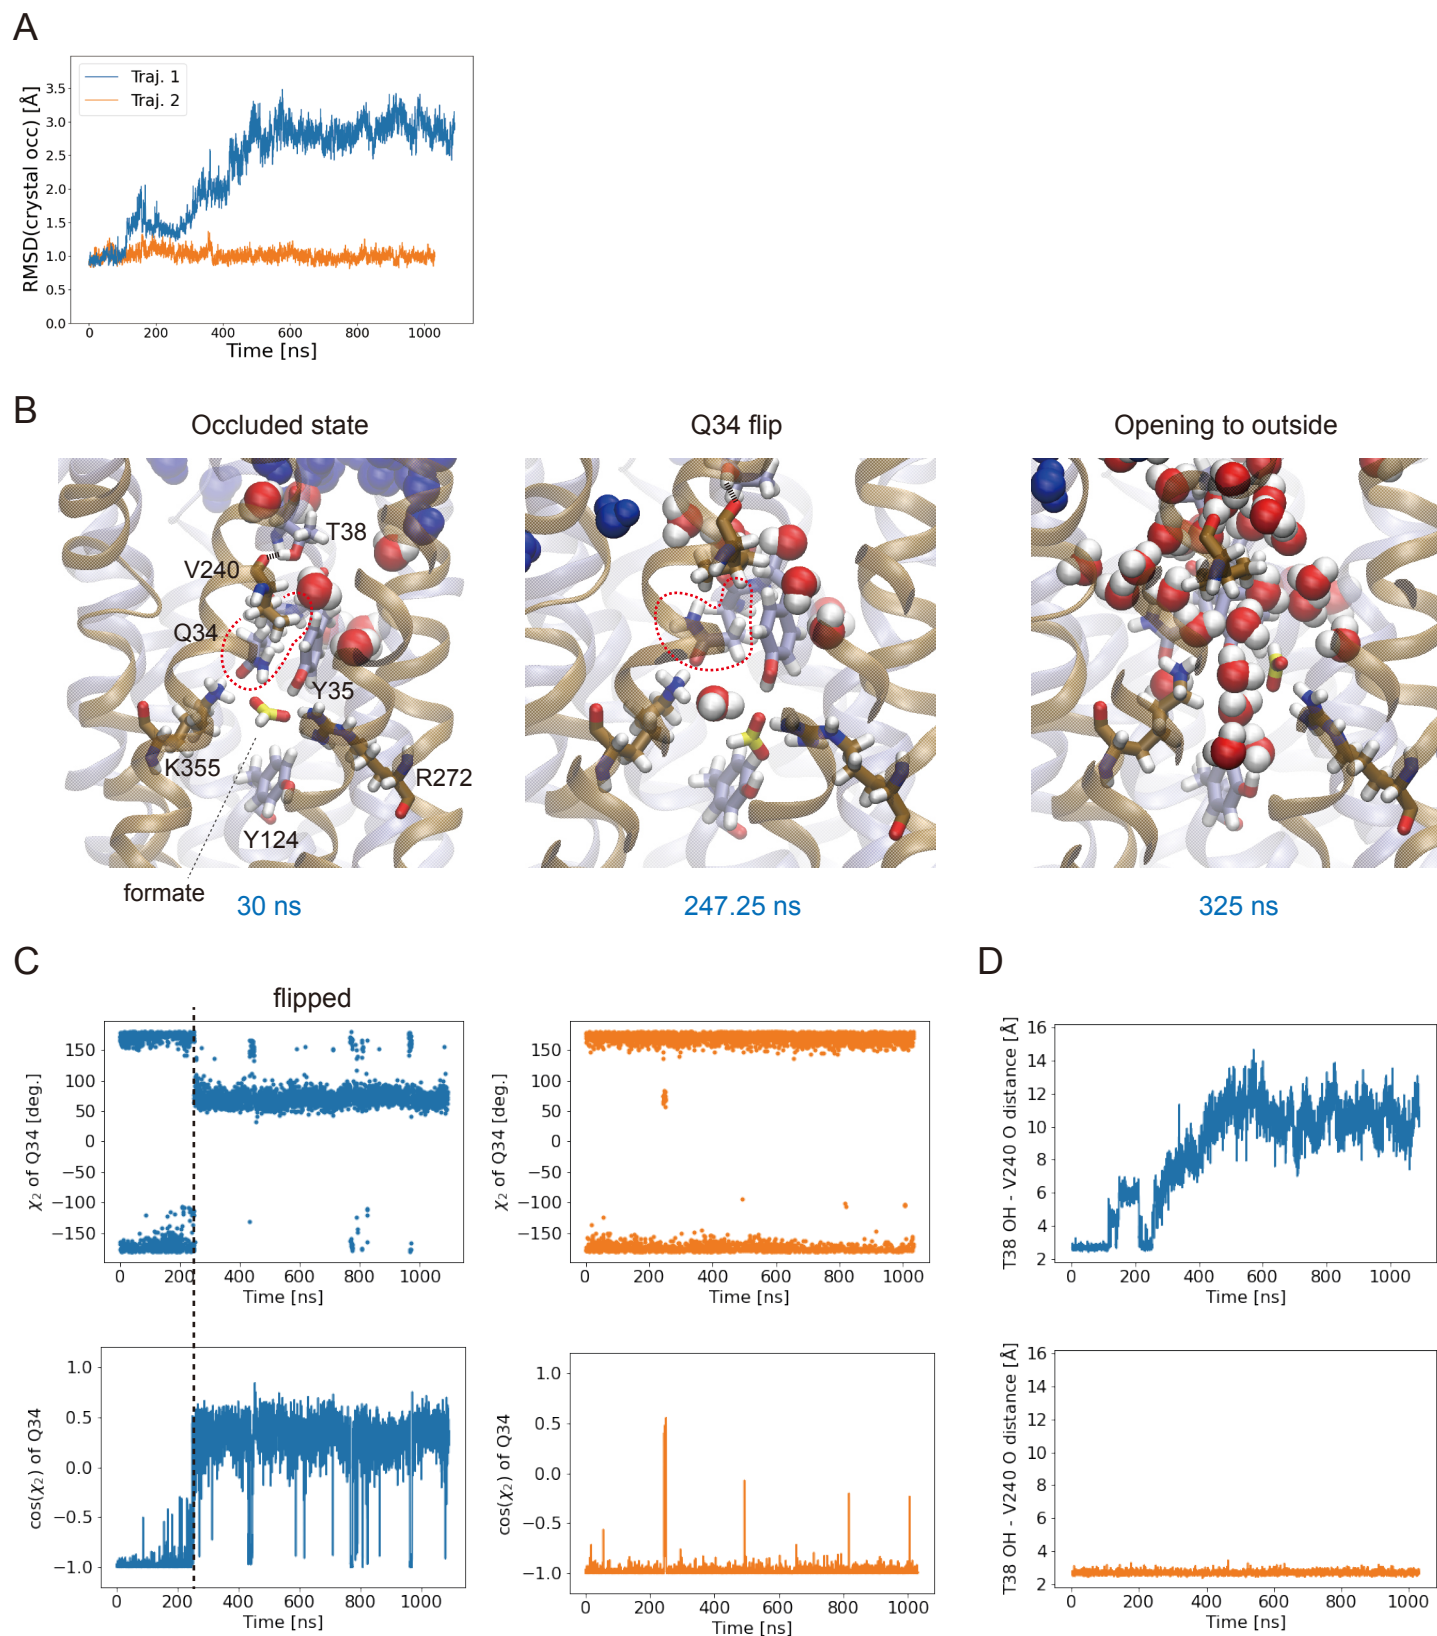

**Extended Data Fig. 8.** Simulation results from the occluded conformation with formate in the binding site. (A) RMSD plot for two independent trajectories. (B) Representative snapshots from a trajectory showing a transition from the occluded to the outward-open conformations. (C) The side chain dihedral  $\chi_2$  of Gln34 is shown for two independent trajectories with different colours. Note that  $\chi_1$  of Gln34 did not show a significant change upon the Gln34 flip in this case. (D) The hydrogen bond donor and acceptor distance between Thr38 and Val240 is shown for two independent trajectories with different colours.

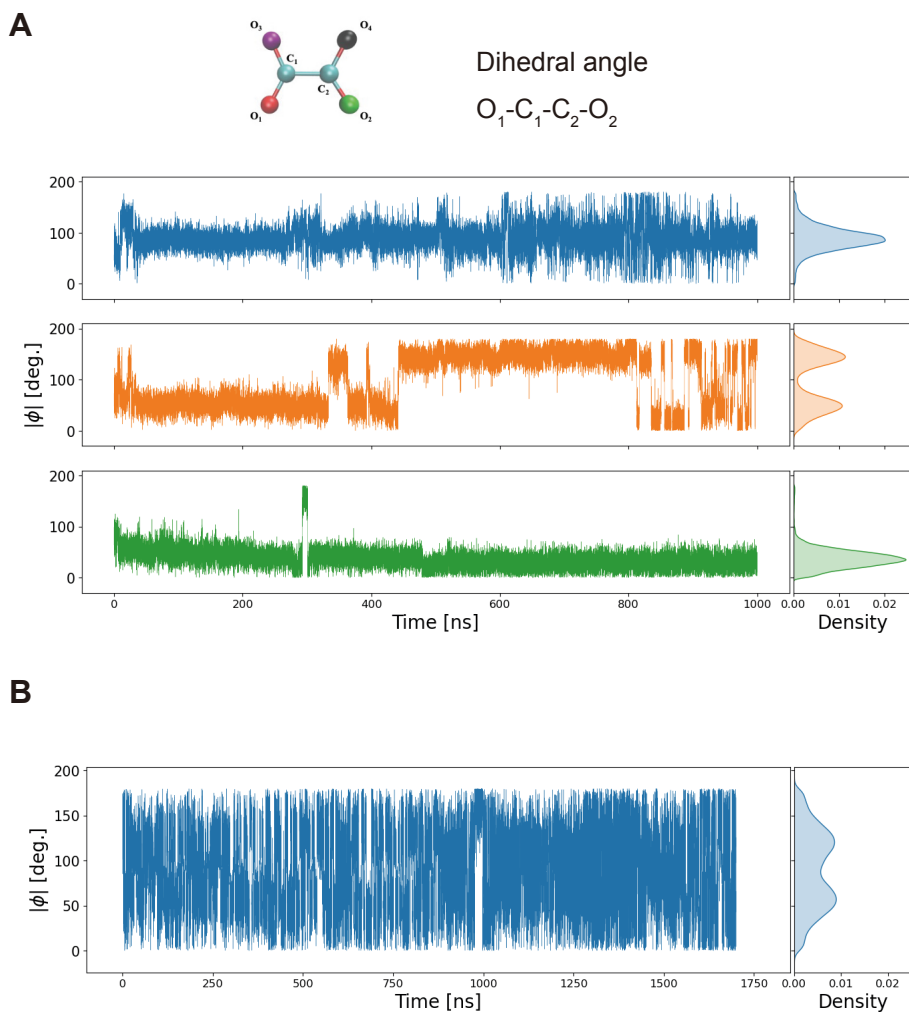

**Extended Data Fig. 9.** OxIT-bound oxalate conformation during MD simulations. (A) The dihedral angle of the oxalate ion in the binding site in MD simulations based on the oxalate-bound occluded OxIT crystal structure is shown for three independent trajectories in the same colour scheme as in Fig. 4D. (B) The dihedral angle of the spontaneously bound oxalate ion in the MD simulation started from the ligand-free outward-facing OxIT crystal structure with protonated Lys355 is shown.

**Extended Data Table 1** X-ray crystallographic data collection and refinement statistics.

|                                     | <b>OxIT-Fab</b><br>(PDB 7F7T)       | <b>OxIT-Fv</b><br>(PDB 7F7V) |
|-------------------------------------|-------------------------------------|------------------------------|
| <b>Data collection</b>              |                                     |                              |
| Space group                         | $P2_12_12$                          | $P2_1$                       |
| Cell dimensions                     |                                     |                              |
| <i>a</i> , <i>b</i> , <i>c</i> (Å)  | 114.95, 233.19, 50.77               | 76.87, 181.67, 81.17         |
| $\alpha$ , $\beta$ , $\gamma$ (°)   | 90, 90, 90                          | 90, 111.37, 90               |
| Resolution (Å)                      | 46.64-2.60 (2.94-2.60) <sup>a</sup> | 47.26-3.10 (3.40-3.10)       |
| $R_{\text{merge}}$                  | 34.5(454.6) <sup>b</sup>            | 83.9(332.3) <sup>b</sup>     |
| $I/\sigma(I)$                       | 16.45 (1.71) <sup>b</sup>           | 5.01 (1.26) <sup>b</sup>     |
| $CC_{1/2}$                          | 99.7 (65.1) <sup>b</sup>            | 98.0 (68.6) <sup>b</sup>     |
| Ellipsoidal Completeness            | 92.9 (77.4) <sup>b</sup>            | 88.4 (54.8) <sup>b</sup>     |
| Spherical completeness              | 52.4(8.8) <sup>b</sup>              | 69.8(14.4) <sup>b</sup>      |
| Redundancy                          | 99.8 (72.1) <sup>b</sup>            | 24.8 (24.5) <sup>b</sup>     |
| <b>Refinement</b>                   |                                     |                              |
| Resolution (Å)                      | 21.08-3.00 (3.11-3.00)              | 46.23-3.30 (3.42-3.30)       |
| No. reflections                     | 20960                               | 25465                        |
| $R_{\text{work}} / R_{\text{free}}$ | 23.7/27.8 (28.5/30.0)               | 26.0/28.6 (38.9/39.2)        |
| No. atoms                           |                                     |                              |
| Protein                             | 6200                                | 9517                         |
| Oxalate                             | 6                                   | -                            |
| <i>B</i> factors                    |                                     |                              |
| Protein                             | 51.2                                | 53.9                         |
| Oxalate                             | 42.4                                | -                            |
| R.m.s. deviations                   |                                     |                              |
| Bond lengths (Å)                    | 0.003                               | 0.003                        |
| Bond angles (°)                     | 0.59                                | 0.61                         |

<sup>a</sup>Values in parentheses are for highest-resolution shell.

<sup>b</sup>Values reported by STARANISO anisotropy & Bayesian estimation server.



**Extended Data Table 2.** Oxalate dihedral angle and binding distances from the results of QM and QM-MM geometry optimisations.

|                                                                                                              | Dihedral angle                                                           | Binding distance             |                              |                               |                             |                              |
|--------------------------------------------------------------------------------------------------------------|--------------------------------------------------------------------------|------------------------------|------------------------------|-------------------------------|-----------------------------|------------------------------|
|                                                                                                              | O <sub>1</sub> -C <sub>1</sub> -C <sub>2</sub> -O <sub>2</sub> angle (°) | O <sub>1</sub> -Y124(OH) (Å) | O <sub>2</sub> -K355(NZ) (Å) | O <sub>3</sub> -R272(NH2) (Å) | O <sub>4</sub> -Y35(OH) (Å) | O <sub>4</sub> -Q34(NE2) (Å) |
| Crystal structure                                                                                            | 60.1                                                                     | 3.0                          | 3.2                          | 2.6                           | 2.3                         | > 3                          |
| QM<br>9 frozen residues (Q34, Y35, Y124, Y150, R272, W324, Y328, W352, K355) + free oxalate                  |                                                                          |                              |                              |                               |                             |                              |
| B3LYP                                                                                                        | 68.2                                                                     | 2.7                          | 2.8                          | 2.8                           | 2.6                         | > 3                          |
| B3LYP-D3BJ                                                                                                   | 68.2                                                                     | 2.7                          | 2.8                          | 2.8                           | 2.6                         | > 3                          |
| QM-MM<br>Oxalate, Q34, Y35, Y124, R272, K355 (QM) + other region of the protein (MM)                         |                                                                          |                              |                              |                               |                             |                              |
| B3LYP-D3BJ                                                                                                   | 50.2                                                                     | 2.7                          | 2.6                          | 2.6                           | 2.8                         | 2.8                          |
| QM-MM<br>Oxalate, Q34, Y35, Y124, Y150, R272, W324, Y328, W352, K355 (QM) + other region of the protein (MM) |                                                                          |                              |                              |                               |                             |                              |
| B3LYP-D3BJ                                                                                                   | 52.3                                                                     | 2.7                          | 2.7                          | 2.6                           | 2.7                         | 2.8                          |
